# Supplementary material
Source: PubMed Central journal article supplement (PMC7884259)

# Structural insights into the recognition of mono- and di-acetylated histones by the ATAD2B bromodomain

## Supporting Information

Jonathan T. Lloyd<sup>1</sup>, Kyle McLaughlin<sup>2</sup>, Mulu Y. Lubula<sup>1</sup>, Jamie C. Gay<sup>1#</sup>, Andrea Dest<sup>2</sup>, Cong Gao<sup>2</sup>, Margaret Phillips<sup>1</sup>, Marco Tonelli<sup>3</sup>, Gabriel Cornilescu<sup>3</sup>, Matthew R. Marunde<sup>4</sup>, Chiara M. Evans<sup>1</sup>, Samuel P. Boyson<sup>1</sup>, Samuel Carlson<sup>1</sup>, Michael-Christopher Keogh<sup>4</sup>, John L. Markley<sup>3</sup>, Seth Fritze<sup>2</sup> and Karen C. Glass<sup>1\*</sup>

<sup>1</sup>Department of Pharmaceutical Sciences, Albany College of Pharmacy and Health Sciences, Colchester, VT, 05446, USA

<sup>2</sup>Department of Biomedical and Health Sciences, University of Vermont, Burlington, VT 05405, USA

<sup>3</sup>National Magnetic Resonance Facility at Madison and Department of Biochemistry, University of Wisconsin-Madison, Madison, WI, 53706, USA

<sup>4</sup>EpiCypher Inc, Durham, NC, 27709, USA

### Table of Contents

Pg. 2 Supplementary Figure 1. Characterization of the ATAD2/B bromodomain binding curves for the dCypher assay.

Pg. 3 Supplementary Figure 2. ITC measurements of the interaction between acetylated histone ligands and the ATAD2B bromodomain.

Pg. 4 Supplementary Figure 3. Interaction of the ATAD2B bromodomain with acetylated histone ligands.

Pg. 5 Supplementary Figure 4. ATAD2 and ATAD2B gene structures and splicing patterns.

Pg. 6 Supplementary Figure 5. ITC measurements of the interaction between acetylated histone ligands and mutant ATAD2B bromodomain proteins.

Pg. 7 Supplementary Figure 6. Analysis of ATAD2B splice isoform expression from RNAseq data.

Pg. 8 Supplementary Figure 7. Sequence alignment of the ATAD2 and ATAD2B bromodomains.

Pg. 9-46 HPLC and MS reports for the histone peptides tested by ITC and listed in Table 1.

Pg. 47 1D <sup>1</sup>H NMR spectrum of compound 38.

**Supplementary Figure 1. Characterization of the ATAD2/B bromodomain binding curves for the dCypher assay.** (A) The GST-tagged ATAD2 bromodomain (residues 981-1108) and (B) ATAD2B bromodomain (residues 953-1085) were titrated to control biotinylated histone peptides and binding curves determined on AlphaScreen® platform (i.e. dCypher® Phase A: see Methods). X-axes are log(protein concentration (M)) at constant peptide concentration (100 nM); Y-axes are AlphaScreen counts, representing relative strength of binding (n = 2; error bars are S.D.).

A

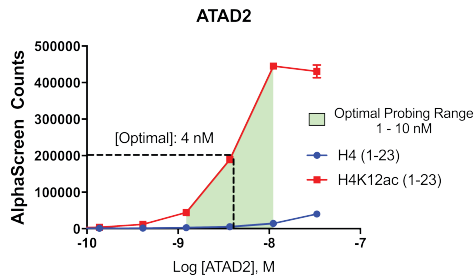

B

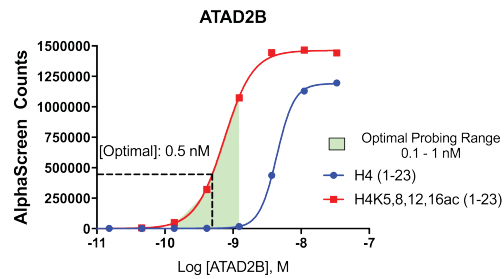

**Supplementary Figure 2. ITC measurements of the interaction between acetylated histone ligands and the ATAD2B bromodomain.** (A-S) Exothermic ITC enthalpy plots for the binding of the ATAD2B bromodomain to unmodified, mono- and di-acetylated histone ligands, as well as the ATAD2 bromodomain inhibitor compound 38. The calculated binding constants are indicated.

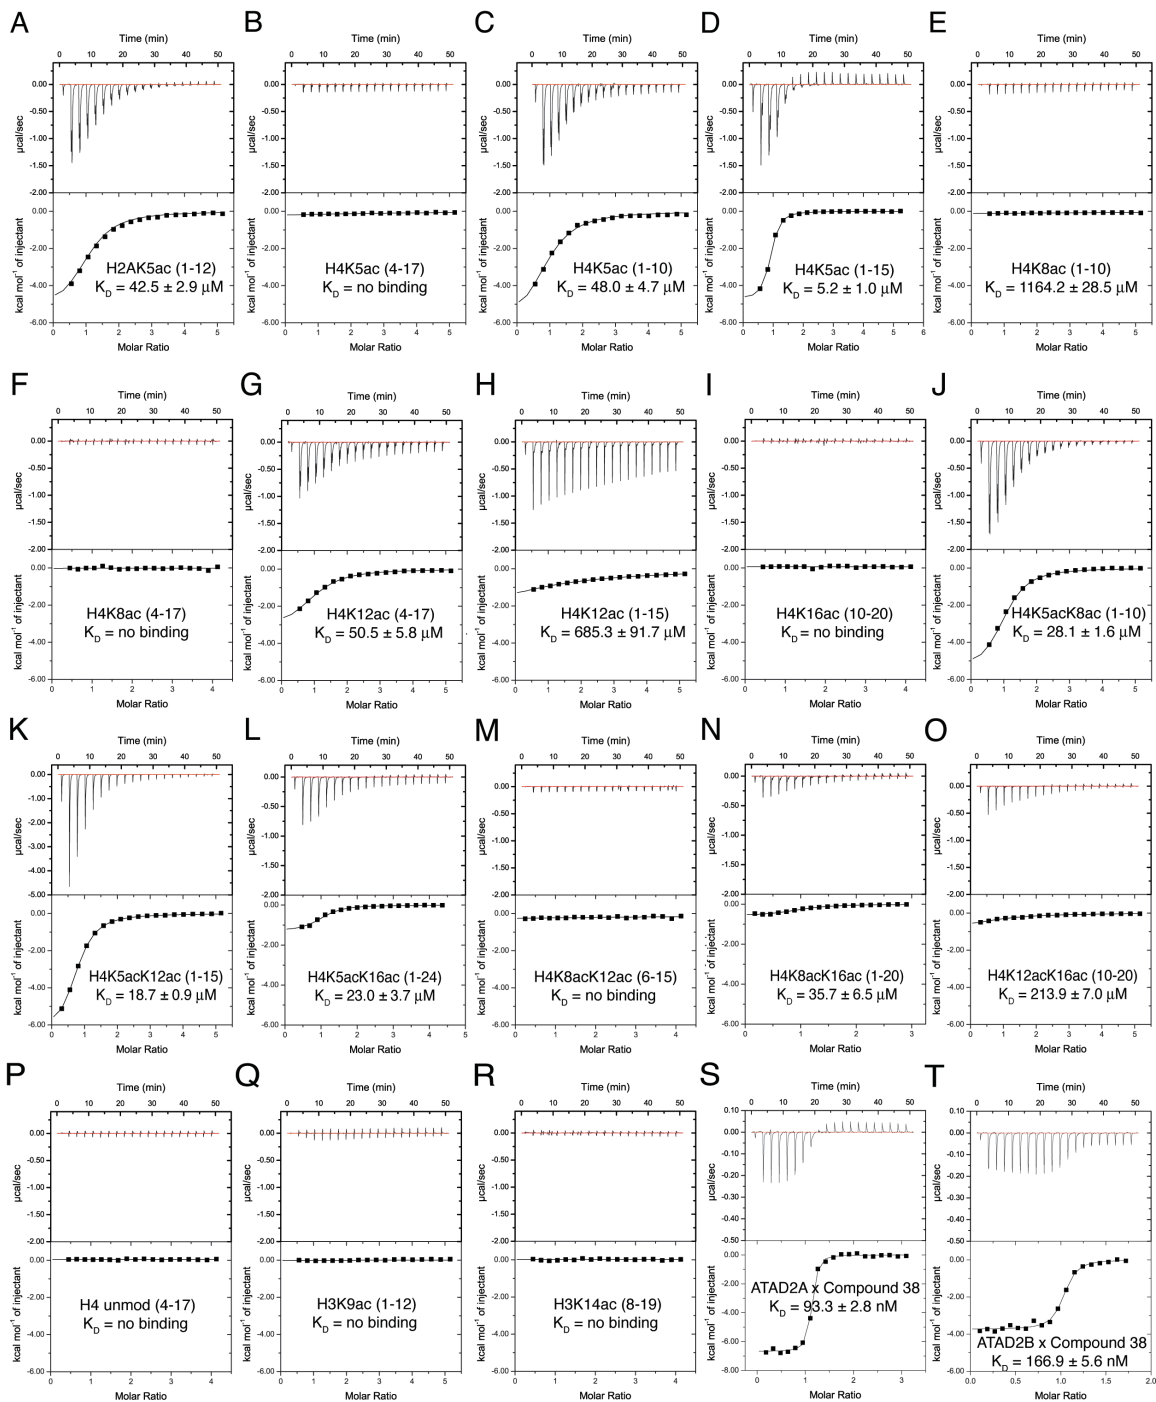

**Supplementary Figure 3. Interaction of the ATAD2B bromodomain with acetylated histone ligands.** (A) Superimposed  $^1\text{H}$ - $^{15}\text{N}$  HSQC spectra of the ATAD2B bromodomain, collected during titrating in the indicated histone peptides. The spectra are color-coded according to the protein/peptide ratio. (B) 2D  $^1\text{H}$ - $^{15}\text{N}$  HSQC spectra of  $^{15}\text{N}$ -labelled ATAD2B bromodomain with the complete HSQC assignments labeled.

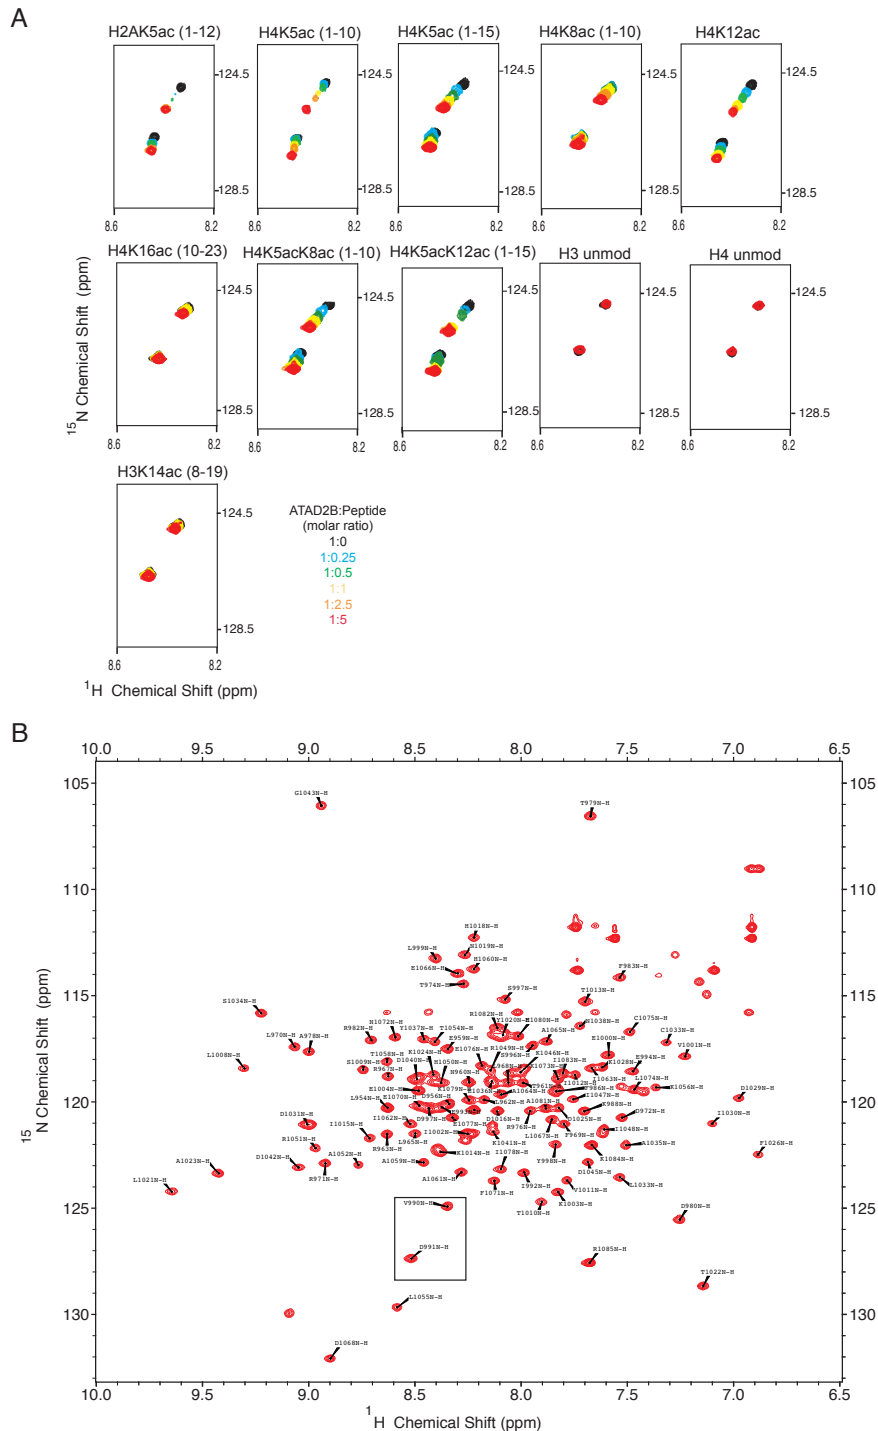

**Supplementary Figure 4.** *ATAD2* and *ATAD2B* gene structures and splicing patterns. (A) Sashimi plots of splice junctions between *ATAD2* and *ATAD2B* are shown. The number of reads spanning each junction is indicated by the size of the sashimi plot curve, and the number of reads spanning novel junctions is indicated by red sashimi plot curves. Coverage plots for total mapped reads are shown (total exon coverages are shown on the y-axis). (B) RT-PCR Analysis of *ATAD2* and *ATAD2B* exon 21-22 splicing patterns.

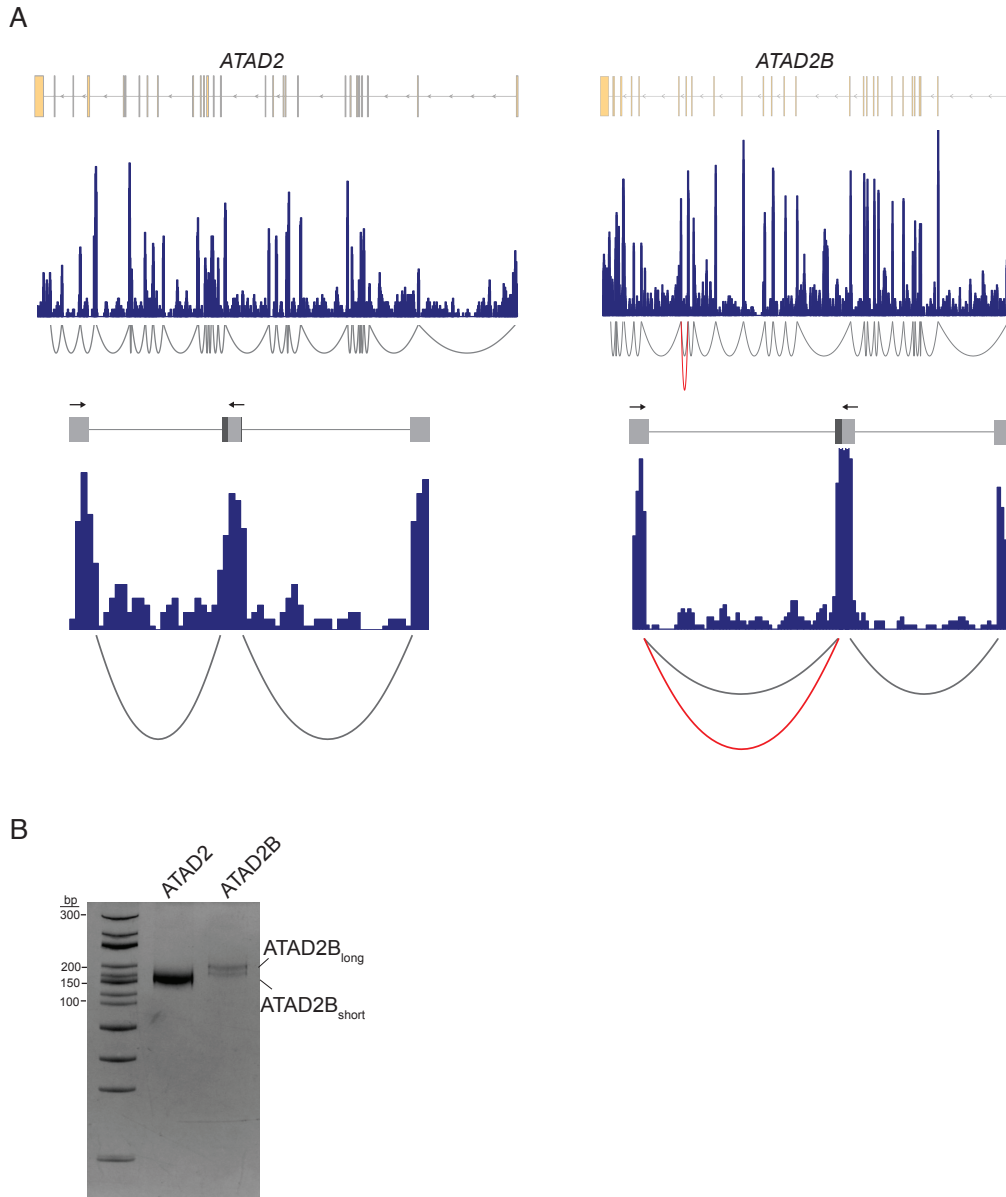

**Supplementary Figure 5. ITC measurements of the interaction between acetylated histone ligands and mutant ATAD2B bromodomain proteins.** (A-O) Exothermic ITC enthalpy plots for the binding of mutant ATAD2B bromodomain proteins to histone peptide ligands that are unmodified, mono- or di-acetylated. The calculated binding constants are indicated.

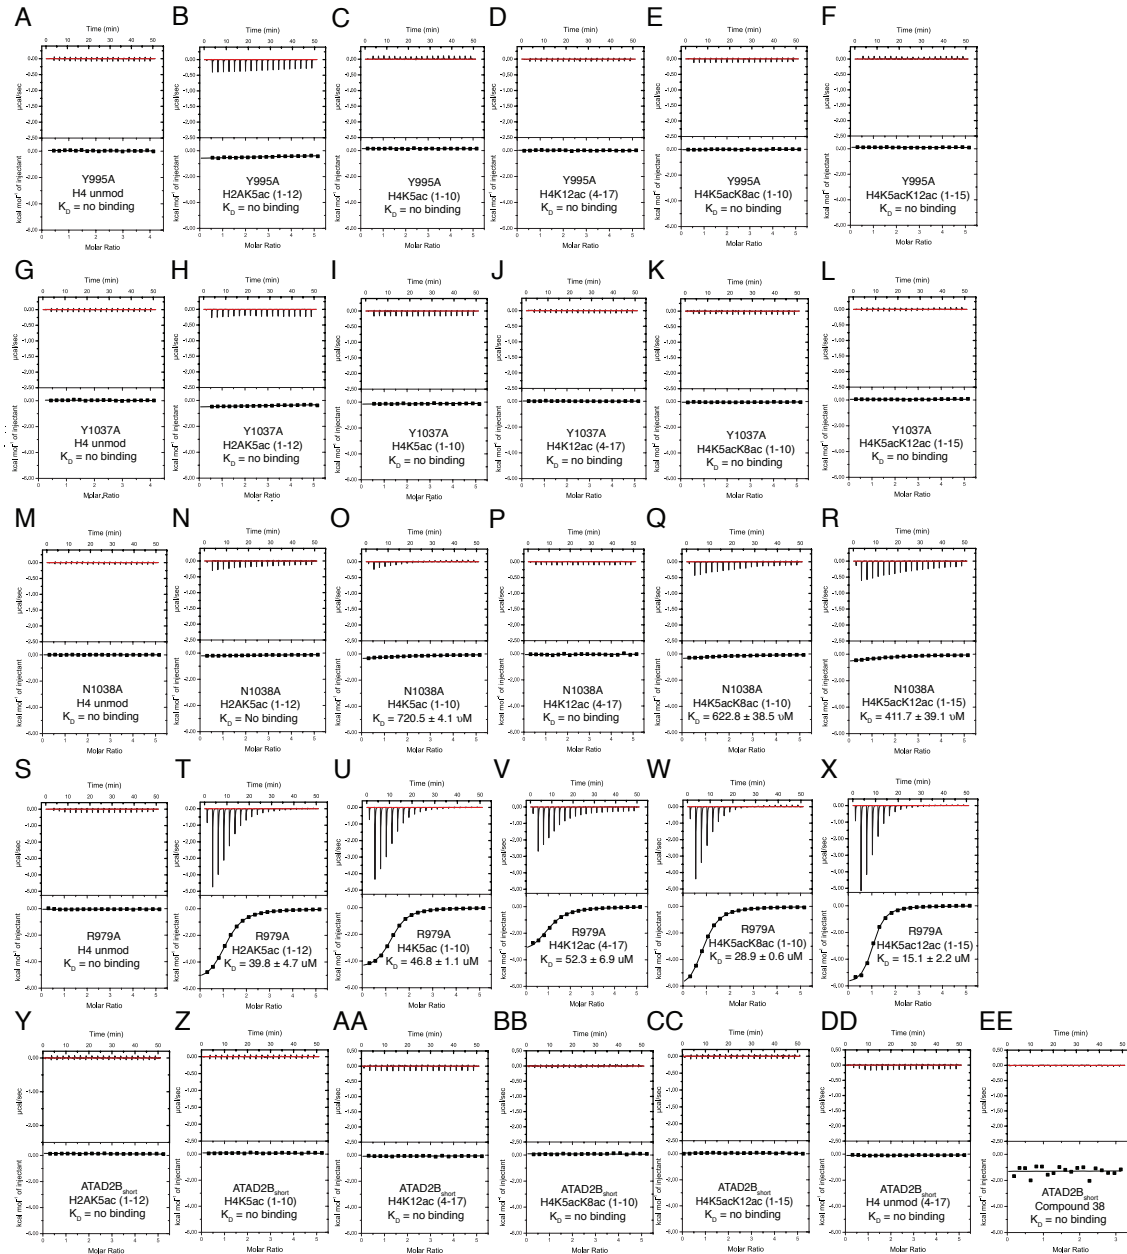

**Supplementary Figure 6.** Analysis of ATAD2B splice isoform expression from RNAseq data. (A) Scatterplot comparing the normalized counts of reads that map to ATAD2B (x-axis) and ATAD2B<sub>short</sub> (y-axis) isoforms across human breast cancer datasets from CCLE. Each dataset is colored by the breast cancer molecular subtype, the dashed line represents a 50:50 ratio of each isoform and the names of 4 cell lines with the highest expression of ATAD2B<sub>short</sub> are labeled. (B) A plot showing the ranked expression of ATAD2B: ATAD2B<sub>short</sub> across human breast cancer cell lines. (C) A box plot of the ATAD2B: ATAD2B<sub>short</sub> ratios across human breast cancer molecular subtypes.

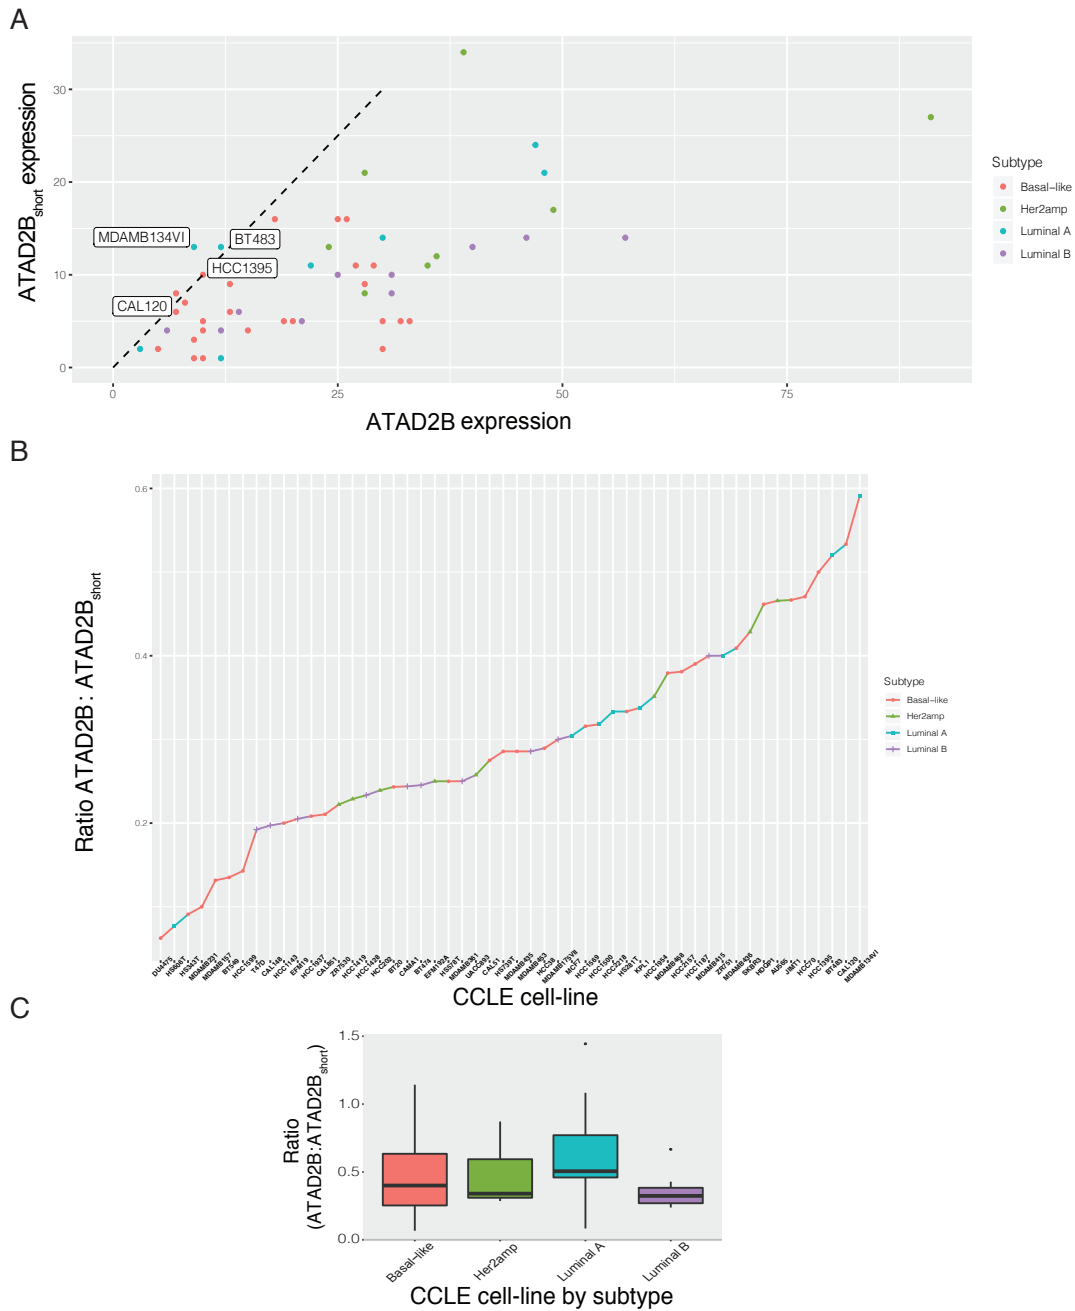

**Supplementary Figure 7. Sequence alignment of the ATAD2 and ATAD2B bromodomains.** Sequence alignment of the ATAD2 and ATAD2B bromodomain proteins corresponding to the amino acids in our ATAD2B bromodomain structure (residues 953-1085). Residues colored magenta are involved in hydrogen bonding to compound 38 for the ATAD2B bromodomain, and compound 42 for the ATAD2 bromodomain. Residues colored green are hydrophobic contacts. Residues that were mutated in this study are marked with a red vertical line. Sequence alignment was performed using the T-Coffee software <sup>1</sup>.

```

          962      972      982      992
ATAD2B  953 EDQEENTLRELRLFLRDVTKRLATDKRFNIFSKPVDIEVSDYLEVI 999
ATAD2   979 EEQEEDTFRELRIFLRNVTHRLAIDKRFVFTKPVDPDEVPDYVTVI 1025
          *:***:*:****:***:***:***:***:***:***:***:***:***:***:***:
          1009      1019      1029      1039
ATAD2B 1000 KEPMDLSTVITKIDKHNYLTAKDFLKDIDLICSNALEYNPDKDPCDK 1046
ATAD2  1026 KQPMDLSSVISKIDLHKYLTVKDYLRDIDLICSNALEYNPDRDPCDR 1072
          *:*****:***:***:***:***:***:***:***:***:***:***:***:
          1056      1066      1076
ATAD2B 1047 IIRHRACTLKDTAHAIIAAELDPEFNKLCÉEIKEARIKR 1085
ATAD2  1073 LIIRHACALRDYAYAIKEELDEDFEQLCEEIQESRKKR 1111
          :*****:***:***:***:***:***:***:***:***:***:***:***:

```

1. Notredame, C., Higgins, D.G. & Heringa, J. T-Coffee: A novel method for fast and accurate multiple sequence alignment. *J Mol Biol* **302**, 205-17 (2000).



### H2AK5ac (1-12) HPLC report

Sample Name: KG #1

```

=====
Acq. Operator   : dc                      Seq. Line :    3
Acq. Instrument : Instrument 1             Location  : P1-F-01
Injection Date  : 8/10/2015 12:16:58 PM   Inj       :    1
                                           Inj Volume: 5 µl
Different Inj Volume from Sequence !      Actual Inj Volume: 2 µl
Acq. Method     : C:\Chem32\1\METHODS\DC1M.m
Last changed    : 8/10/2015 12:14:10 PM by dc
Analysis Method : C:\Chem32\1\METHODS\DC1M.m
Last changed    : 8/10/2015 12:37:50 PM by dc
    
```

NH<sub>2</sub>-SGRGGK(Ac)QGGKARA-amide

H2A(1-12)K5ac, purity>98%

8-19-15

MW=1214

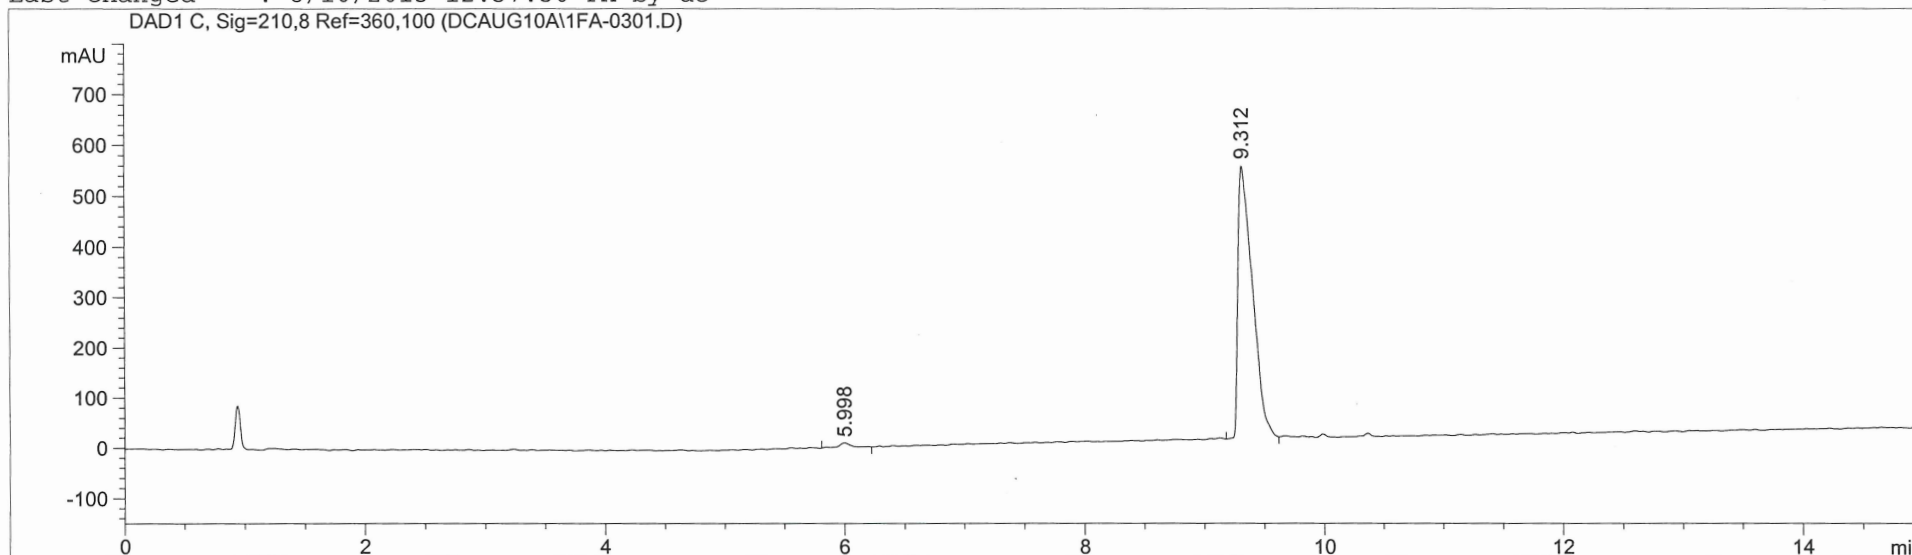

#### Area Percent Report

```

Sorted By      :      Signal
Multiplier     :      1.0000
Dilution       :      1.0000
Use Multiplier & Dilution Factor with ISTDs
    
```

Signal 1: DAD1 C, Sig=210,8 Ref=360,100

| Peak # | RetTime [min] | Type | Width [min] | Area [mAU*s] | Height [mAU] | Area %  |
|--------|---------------|------|-------------|--------------|--------------|---------|
| 1      | 5.998         | BB   | 0.1060      | 68.84024     | 9.55910      | 1.4777  |
| 2      | 9.312         | VV   | 0.1266      | 4589.64307   | 543.08765    | 98.5223 |

H2AK5ac (1-12) MS report

#1

MW 1214

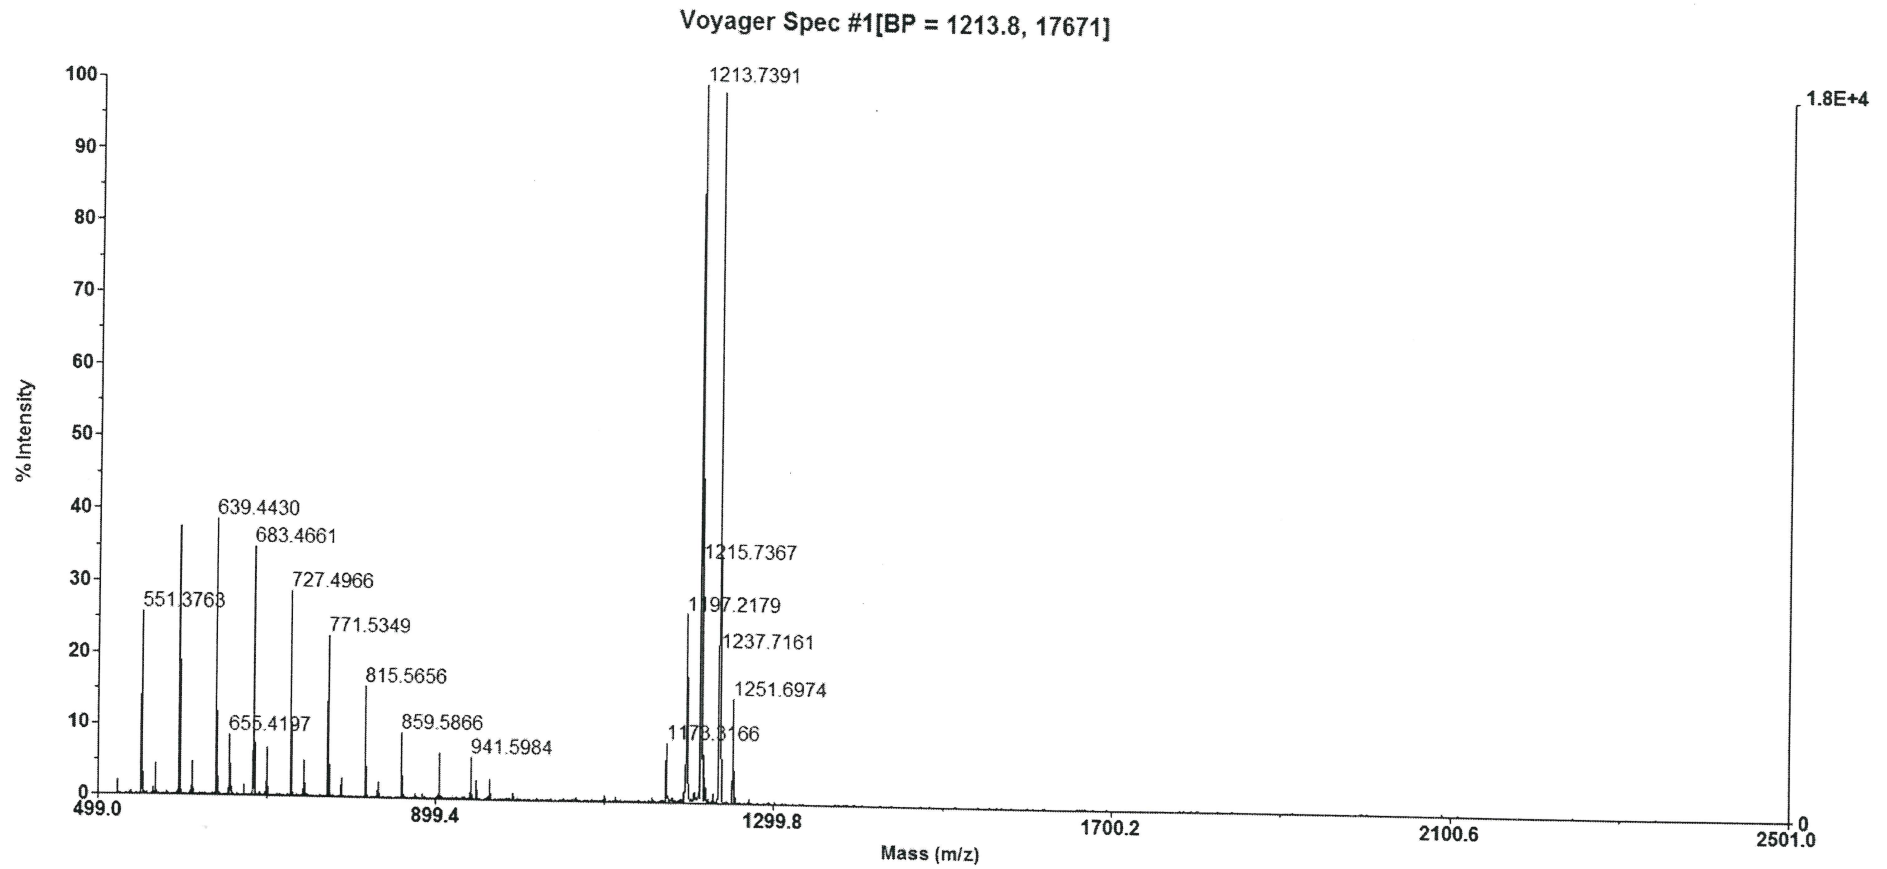

Sample Name: H 4 PURE

H4 unmodified (4-17) HPLC report

```

=====
Acq. Operator   : dc                      Seq. Line :    5
Acq. Instrument : Instrument 1             Location  : Vial 24
Injection Date  : 5/31/2011 2:33:34 PM    Inj       :    1
                                           Inj Volume: 6 µl

Acq. Method     : C:\Chem32\1\METHODS\DC1M.M
Last changed    : 5/31/2011 2:31:11 PM by dc
Analysis Method : C:\Chem32\1\METHODS\30MINWASH50C.M
Last changed    : 5/31/2011 3:25:44 PM by wh
    
```

DAD1 C, Sig=210,8 Ref=360,100 (DCMAY31\024-0501.D)

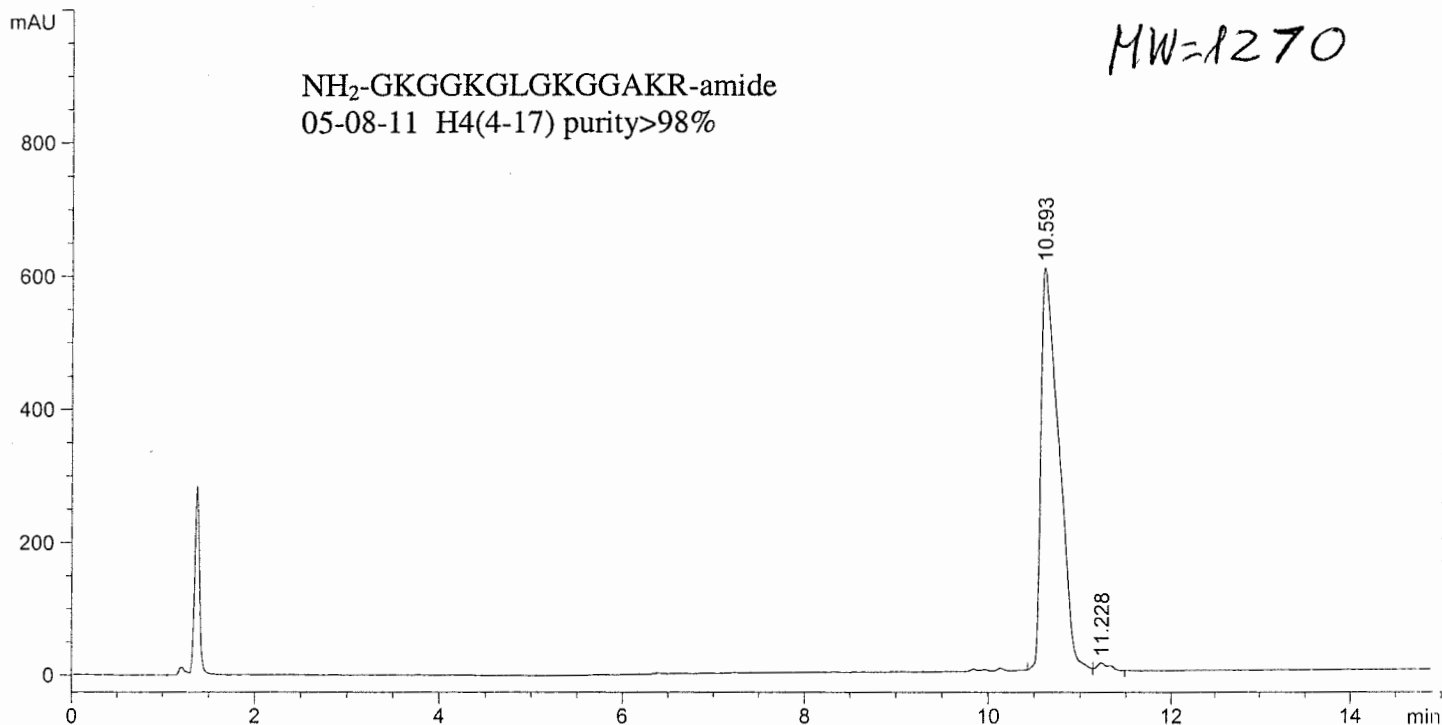

Area Percent Report

```

Sorted By      :      Signal
Multiplier     :      1.0000
Dilution       :      1.0000
Use Multiplier & Dilution Factor with ISTDs
    
```

Signal 1: DAD1 C, Sig=210,8 Ref=360,100

| Peak # | RetTime [min] | Type | Width [min] | Area [mAU*s] | Height [mAU] | Area %  |
|--------|---------------|------|-------------|--------------|--------------|---------|
| 1      | 10.593        | BV   | 0.1955      | 8200.18457   | 607.34192    | 98.6267 |
| 2      | 11.228        | VB   | 0.1292      | 114.17900    | 12.19384     | 1.3733  |

Totals : 8314.36357 619.53576

\*\*\* End of Report \*\*\*

# Display Report - Selected Window Selected Analysis

**Analysis Name:** 024-0501.D

**Instrument:** LC-MSD-Trap-SL

**Print Date:** 5/31/2011 3:26:41 PM

**Method:** DC1M.M

**Operator:** Hodges

**Acq. Date:** 5/31/2011 2:33:56 PM

**Sample Name:** H 4 PURE

**Analysis Info:**

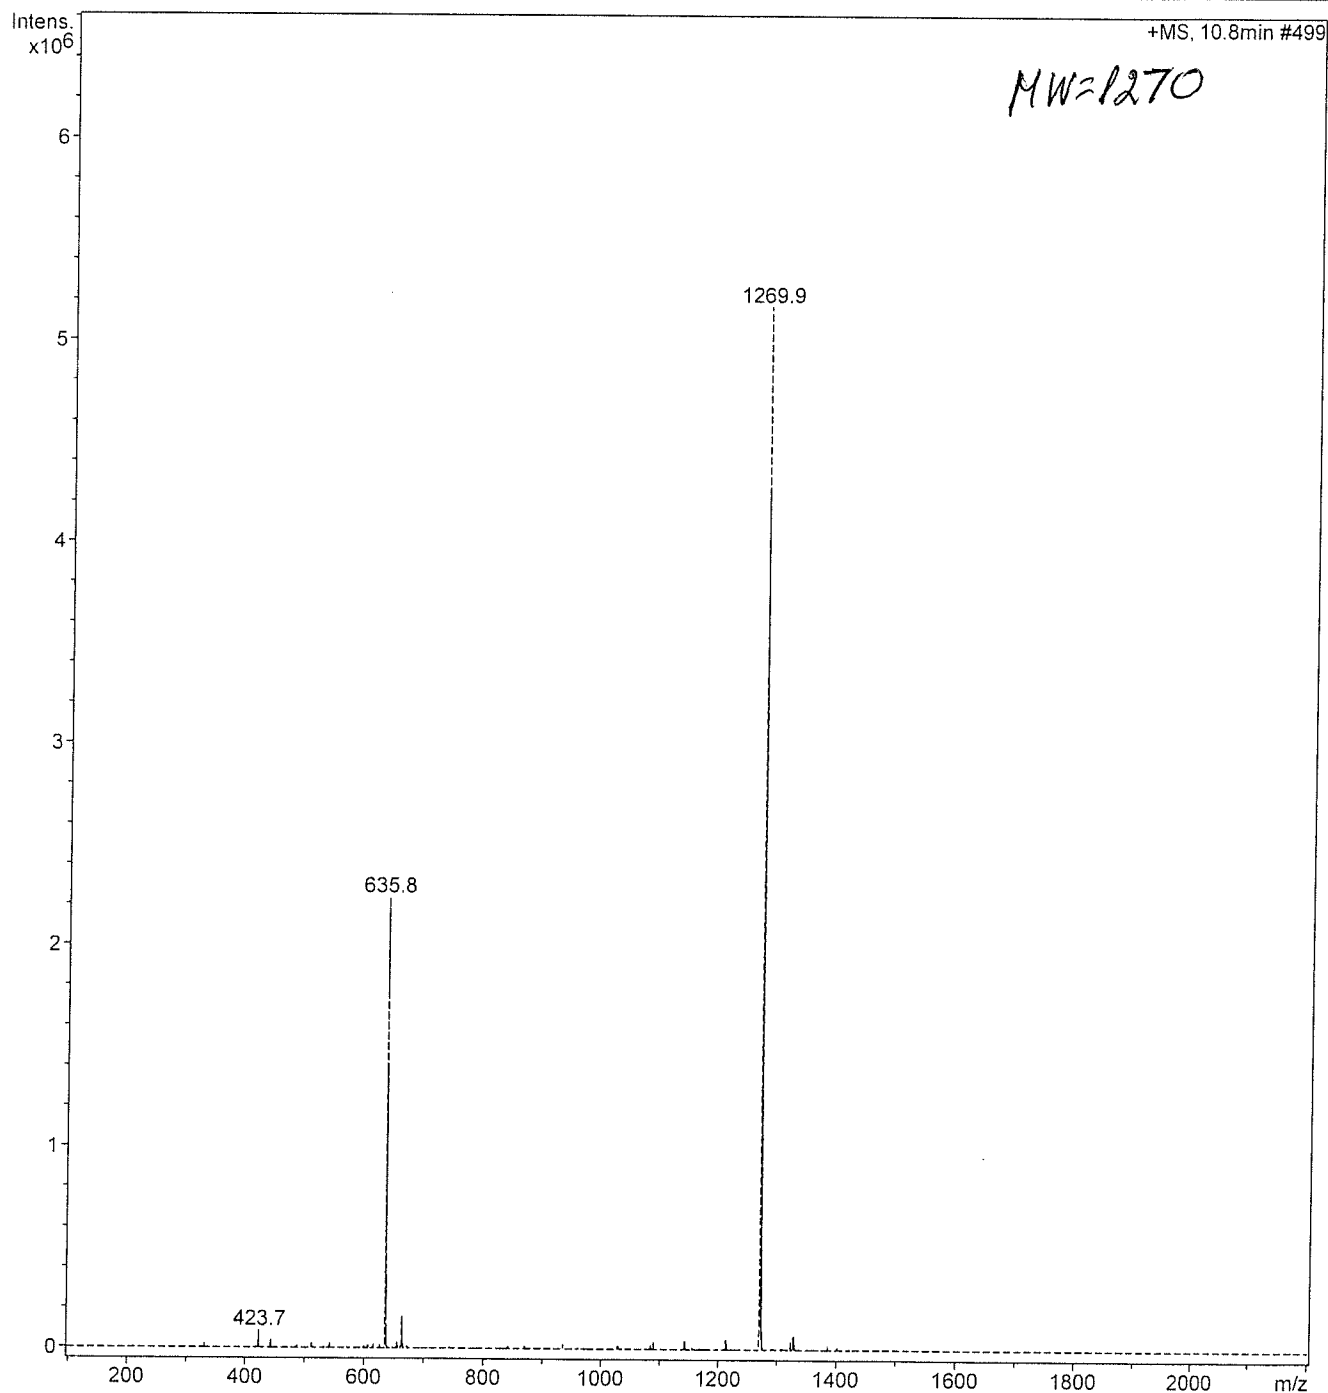

## H4K5ac (1-15) HPLC report

Sample Name:H4K5ac (1-15)  
 Sample ID :U2819EJ240-1  
 Time Processed: 19:48:19  
 Month-Day-Year Processed :10/30/2019

Pump A : 0.065% trifluoroacetic in 100% water (v/v)  
 Pump B : 0.05% trifluoroacetic in 100% acetonitrile (v/v)  
 Total Flow:1 ml/min  
 Wavelength:220 nm

<<LC Time Program>>

| Time  | Module     | Command       | Value |
|-------|------------|---------------|-------|
| 0.01  | Pumps      | Pump A B.Conc | 5     |
| 25.00 | Pumps      | Pump A B.Conc | 65    |
| 25.01 | Pumps      | Pump A B.Conc | 95    |
| 31.00 | Pumps      | Pump A B.Conc | 95    |
| 31.01 | Pumps      | Pump A B.Conc | 5     |
| 40.00 | Pumps      | Pump A B.Conc | 5     |
| 40.01 | Controller | Stop          |       |

<<Column Performance>>

<Detector A>

Column : AlltimaTM C18 4.6 x 250 mm  
 Equipment:ZJ19010324

### <Chromatogram>

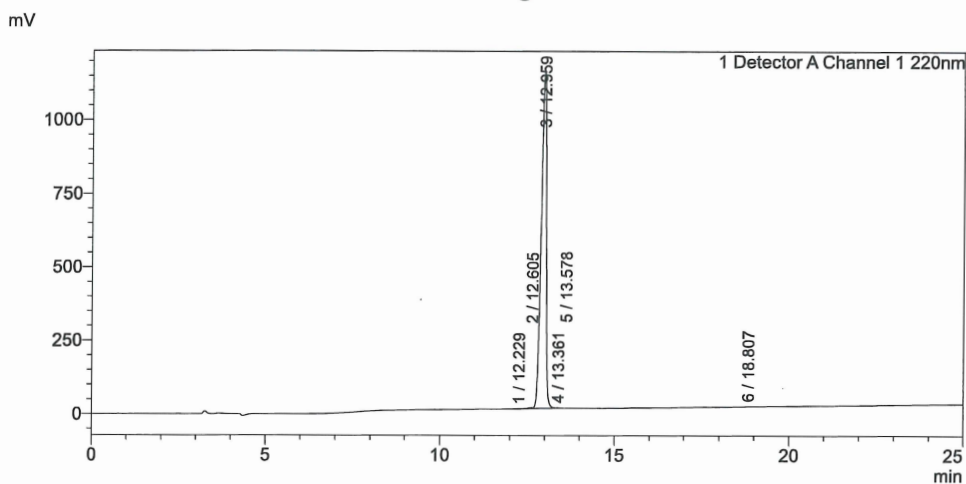

### <Peak Table>

Detector A Channel 1 220nm

| Peak# | Ret. Time | Area     | Height  | Area%   |
|-------|-----------|----------|---------|---------|
| 1     | 12.229    | 11546    | 1144    | 0.097   |
| 2     | 12.605    | 33865    | 3648    | 0.286   |
| 3     | 12.959    | 11807221 | 1149152 | 99.563  |
| 4     | 13.361    | 2802     | 621     | 0.024   |
| 5     | 13.578    | 1550     | 289     | 0.013   |
| 6     | 18.807    | 2072     | 383     | 0.017   |
| Total |           | 11859057 | 1155237 | 100.000 |

# H4K5ac (1-15) MS report

## Mass Spectrum

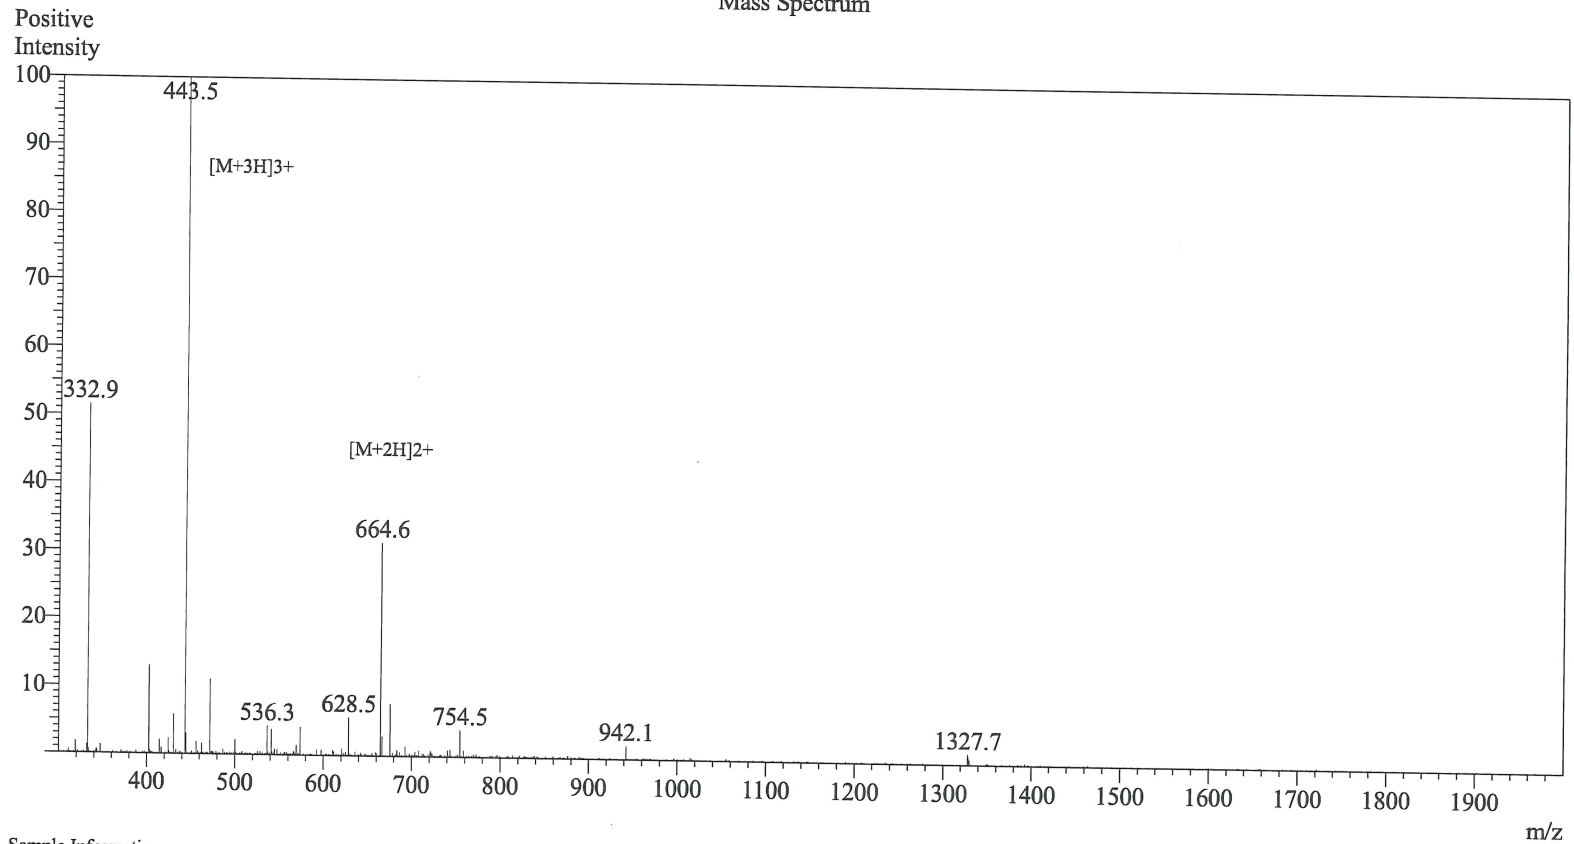

### Sample Information

Acquired by : Gary  
Month-Day Processed : 10/29/19  
Time Processed : 03:13:01 PM  
Injection Volume : 0.3  
Sample Name : H4K5ac (1-15)  
Sample ID : U2819EJ240-1  
Theoretical MW : 1327.49  
Observed MW : 1327.5

Interface : ESI  
Nebulizing Gas Flow : 1.5L/min  
CDL Temp : 250  
Block Temp : 200

Equipment : GK11010007  
Interface Bias : +4.5 kV  
Drying Gas Flow : 5 L/min  
T.Flow : 0.2 ml/min  
B.conc : 50%H2O/50%MeOH

# H4K5ac (1-10) HPLC report

Sample Name: H4K5ac(1-10)  
 Sample ID: U3559EH260-1  
 Time Processed : 8:43:45  
 Month-Day-Year Processed : 09/08/2019

Pump A : 0.065% trifluoroacetic in 100% water (v/v)  
 Pump B : 0.05% trifluoroacetic in 100% acetonitrile (v/v)  
 Total Flow: 1 ml/min  
 Wavelength: 220 nm

<<LC Time Program>>

| Time  | Module     | Command       | Value |
|-------|------------|---------------|-------|
| 0.01  | Pumps      | Pump A B.Conc | 5     |
| 25.00 | Pumps      | Pump A B.Conc | 65    |
| 25.01 | Pumps      | Pump A B.Conc | 95    |
| 31.00 | Pumps      | Pump A B.Conc | 95    |
| 31.01 | Pumps      | Pump A B.Conc | 5     |
| 40.00 | Pumps      | Pump A B.Conc | 5     |
| 40.01 | Controller | Stop          | 5     |

<<Column Performance>>

<Detector A>

Column : Inertsil ODS-3 4.6 x 250 mm  
 Equipment: GK12010012

## <Chromatogram>

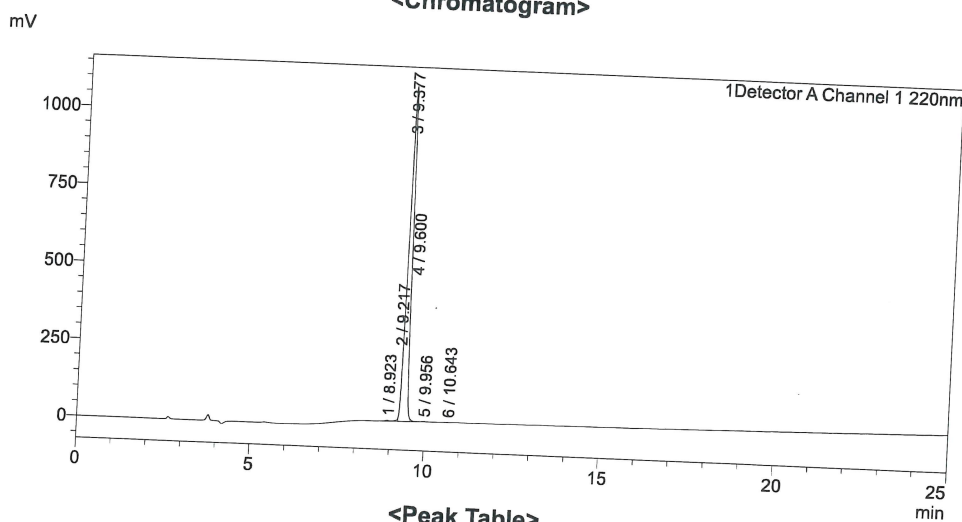

## <Peak Table>

| Peak# | Ret. Time | Area    | Height  | Area%   |
|-------|-----------|---------|---------|---------|
| 1     | 8.923     | 21854   | 2574    | 0.267   |
| 2     | 9.217     | 33068   | 5040    | 0.403   |
| 3     | 9.377     | 8098036 | 1075473 | 98.756  |
| 4     | 9.600     | 27857   | 6103    | 0.340   |
| 5     | 9.956     | 15390   | 1260    | 0.188   |
| 6     | 10.643    | 3877    | 572     | 0.047   |
| Total |           | 8200082 | 1091022 | 100.000 |

# H4K5ac (1-10) MS report

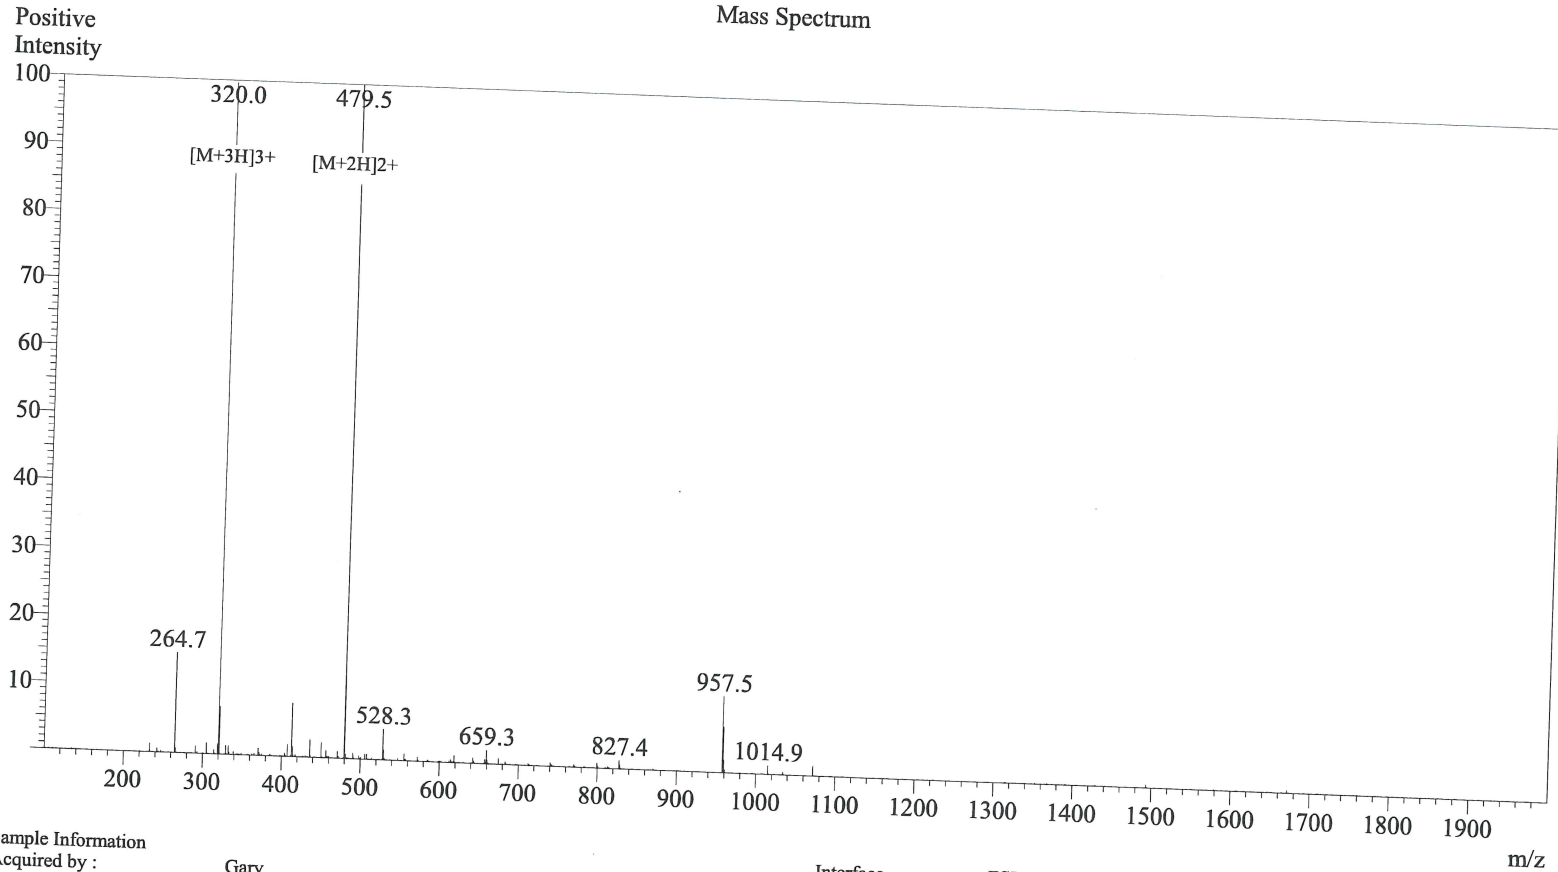

## Sample Information

Acquired by : Gary  
Month-Day Processed : 09/07/19  
Time Processed : 18:01:00  
Injection Volume : 0.3  
Sample Name : H4K5ac(1-10)  
Sample ID : U3559EH260-1  
Theoretical MW : 957.09  
Observed MW : 957.0

Interface : ESI  
Nebulizing Gas Flow : 1.5L/min  
CDL Temp : 250  
Block Temp : 200

Equipment : GK11010007  
Interface Bias : +4.5 kV  
Drying Gas Flow : 5 L/min  
T.Flow : 0.2 ml/min  
B.conc : 50%H<sub>2</sub>O/50%MeOH





# Display Report - Selected Window Selected Analysis

**Analysis Name:** 014-0901.D  
**Method:** DC1M.M  
**Sample Name:** K5Ac PURE  
**Analysis Info:**

**Instrument:** LC-MSD-Trap-SL  
**Operator:** Hodges

**Print Date:** 5/10/2011 11:12:41 AM  
**Acq. Date:** 5/9/2011 8:21:14 PM

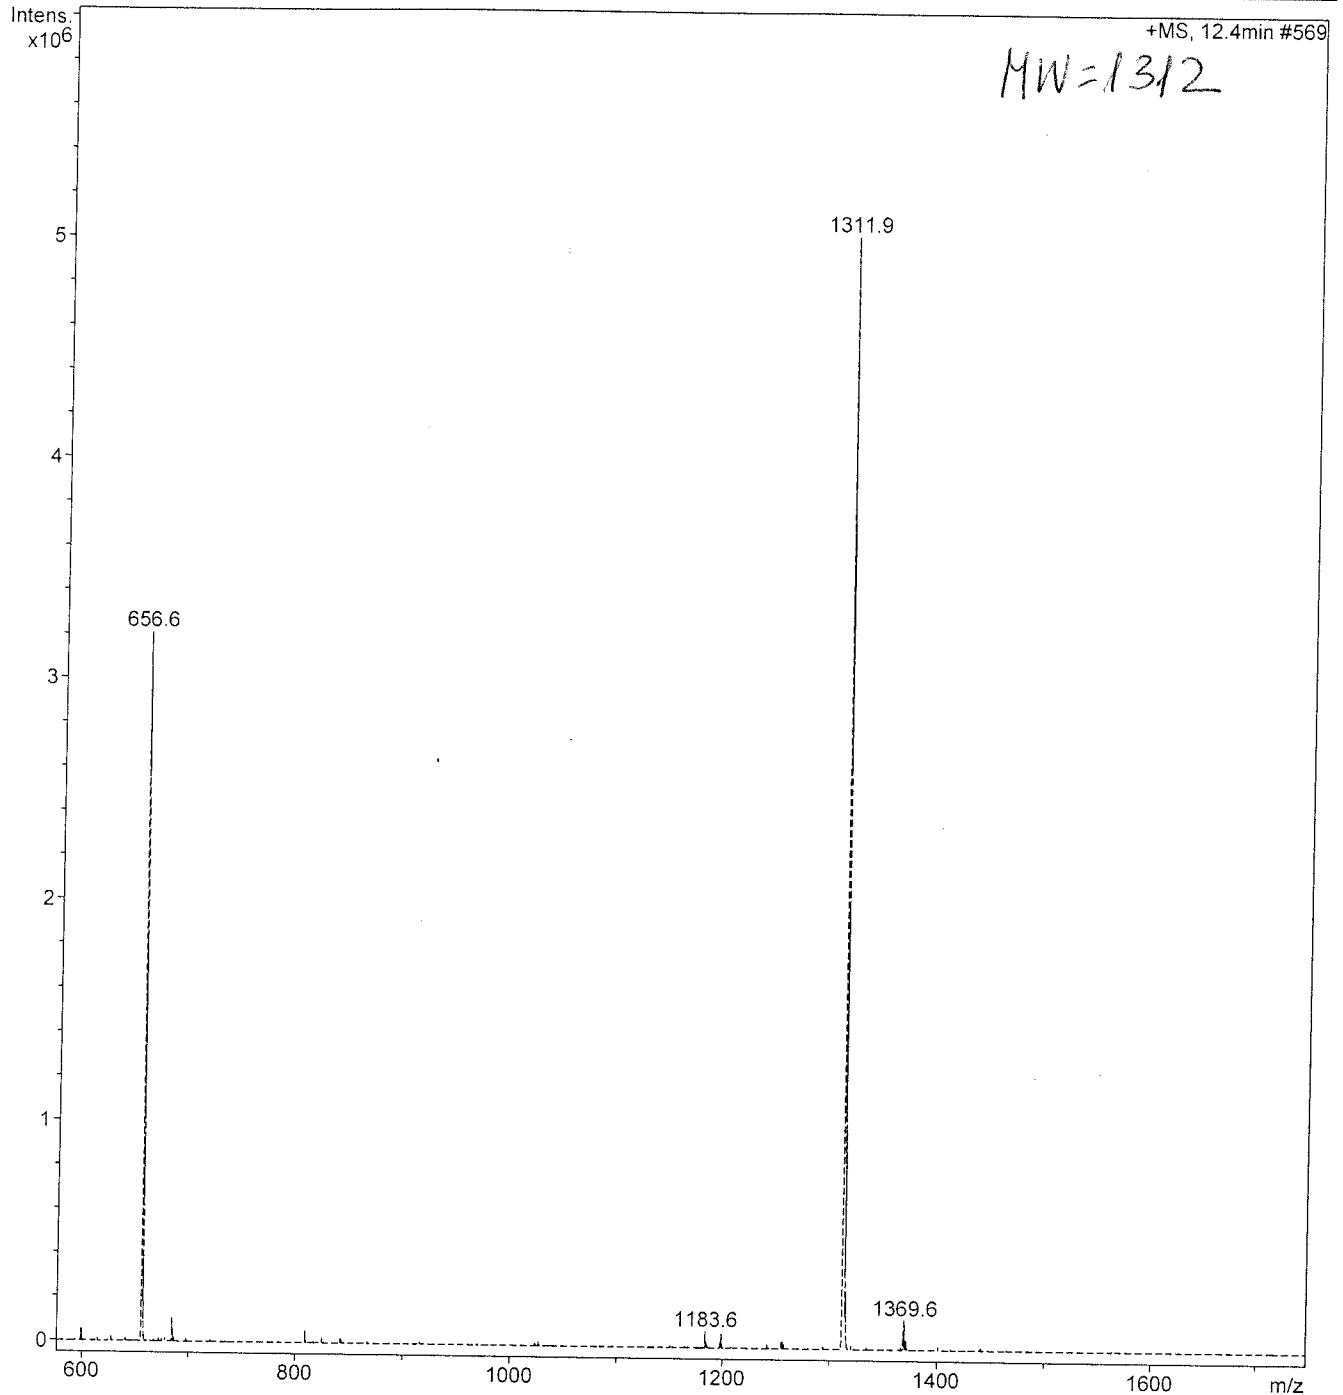

# H4K8ac (1-10) HPLC report

Data File C:\CHEM32\1\DATA\DC05212017\1EE-1801.D

Sample Name: 67

```
=====
Acq. Operator   : dc                               Seq. Line :   18
Acq. Instrument : Instrument 1                     Location  : P1-E-05
Injection Date  : 5/21/2017 2:51:19 PM            Inj       :    1
                                                    Inj Volume: 3 µl
=====
```

```
Acq. Method     : C:\Chem32\1\METHODS\DC2M.m
Last changed    : 5/21/2017 2:49:24 PM by dc
Analysis Method  : C:\Chem32\1\METHODS\DC2M.m
Last changed    : 5/21/2017 5:42:40 PM by dc
```

NH<sub>2</sub>-SGRGKGGK(Ac)GL-amide

H4(1-10)K8ac purity>98%

5-23-2017 MW 958

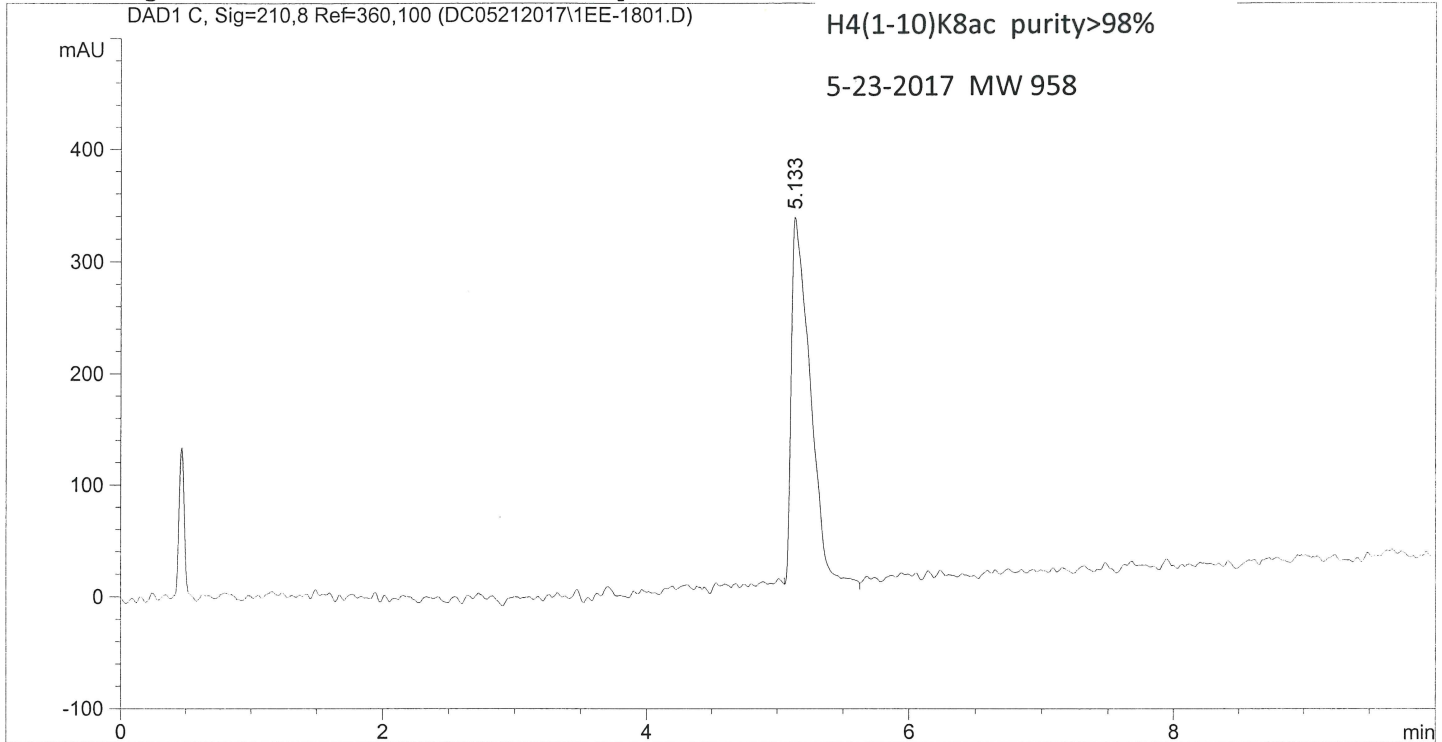

## Area Percent Report

```
=====
Sorted By      :      Signal
Multiplier     :      1.0000
Dilution       :      1.0000
Use Multiplier & Dilution Factor with ISTDs
=====
```

Signal 1: DAD1 C, Sig=210,8 Ref=360,100

| Peak # | RetTime [min] | Type | Width [min] | Area [mAU*s] | Height [mAU] | Area %   |
|--------|---------------|------|-------------|--------------|--------------|----------|
| 1      | 5.133         | VV   | 0.1447      | 3891.93311   | 347.34039    | 100.0000 |

Totals : 3891.93311 347.34039

\*\*\* End of Report \*\*\*

H4K8ac (1-10) MS report

Display Report - Selected Window Selected Analysis

Analysis Name: 1EE-1801.D

Instrument: LC-MSD-Trap-XCT

Print Date: 5/21/2017 5:45:54 PM

Method: DC2M.M

Operator: Hodges

Acq. Date: 5/21/2017 2:51:17 PM

Sample Name: 67

Analysis Info:

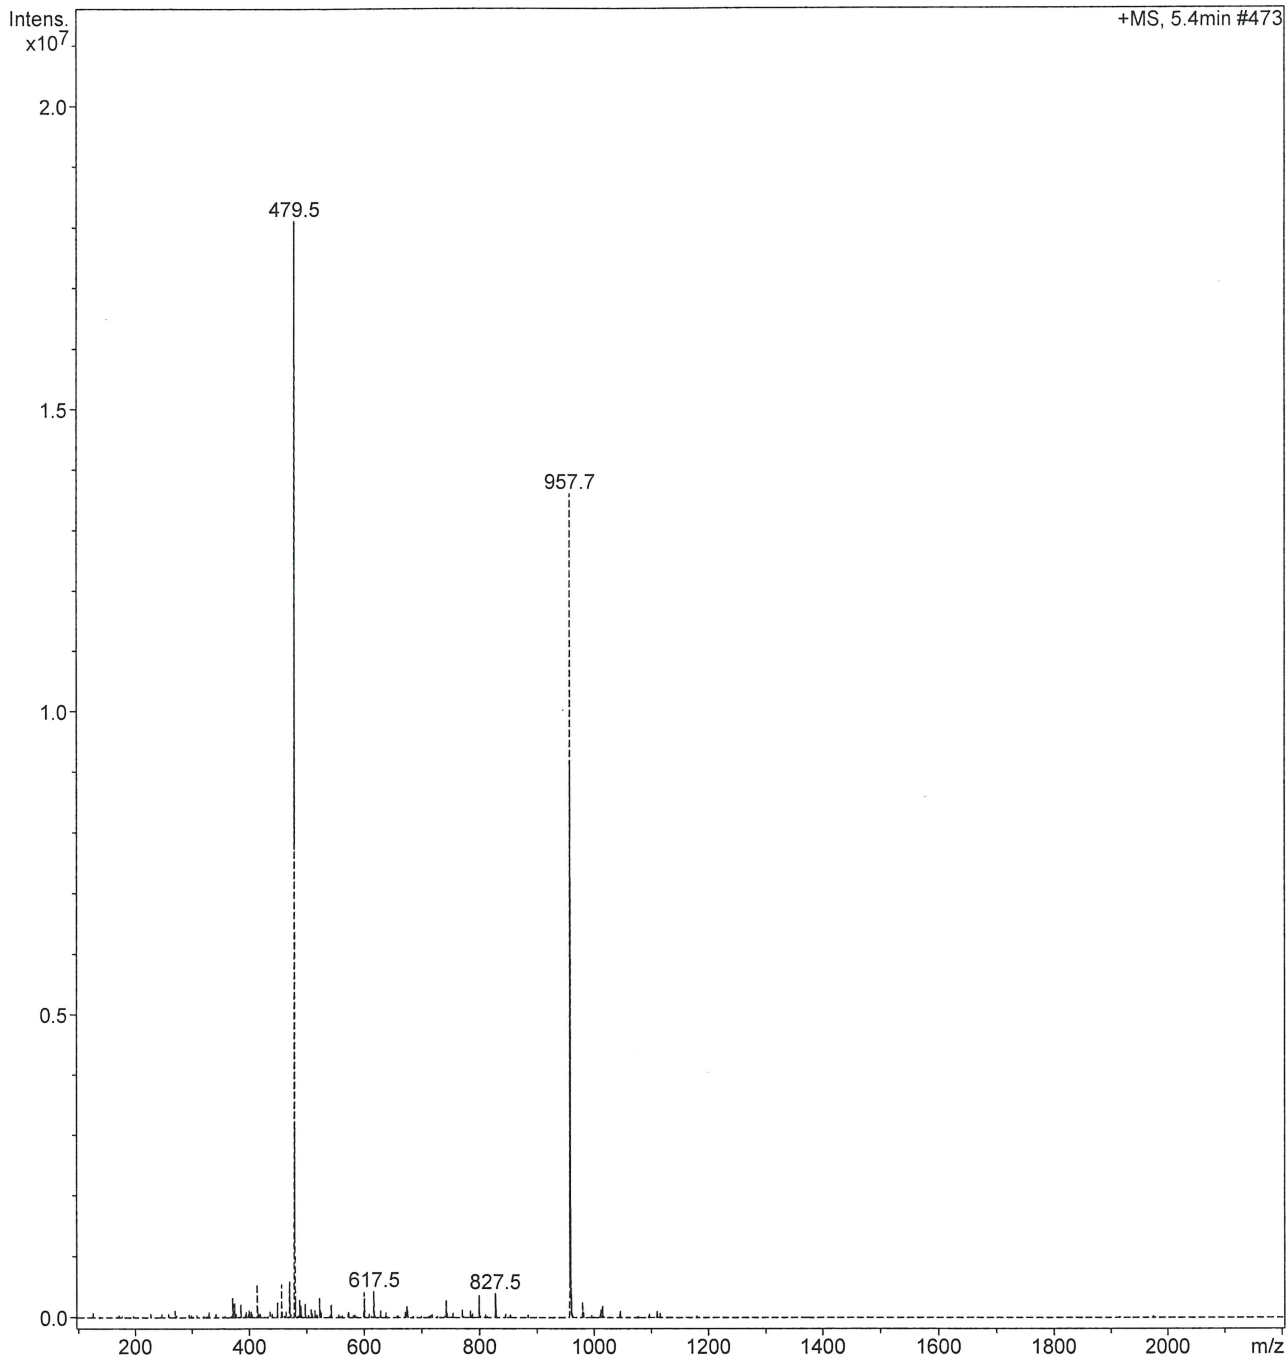



# Display Report - Selected Window Selected Analysis

**Analysis Name:** 016-1101.D

**Instrument:** LC-MSD-Trap-SL

**Print Date:** 5/10/2011 11:11:27 AM

**Method:** DC1M.M

**Operator:** Hodges

**Acq. Date:** 5/9/2011 9:28:16 PM

**Sample Name:** K8Ac PURE

**Analysis Info:**

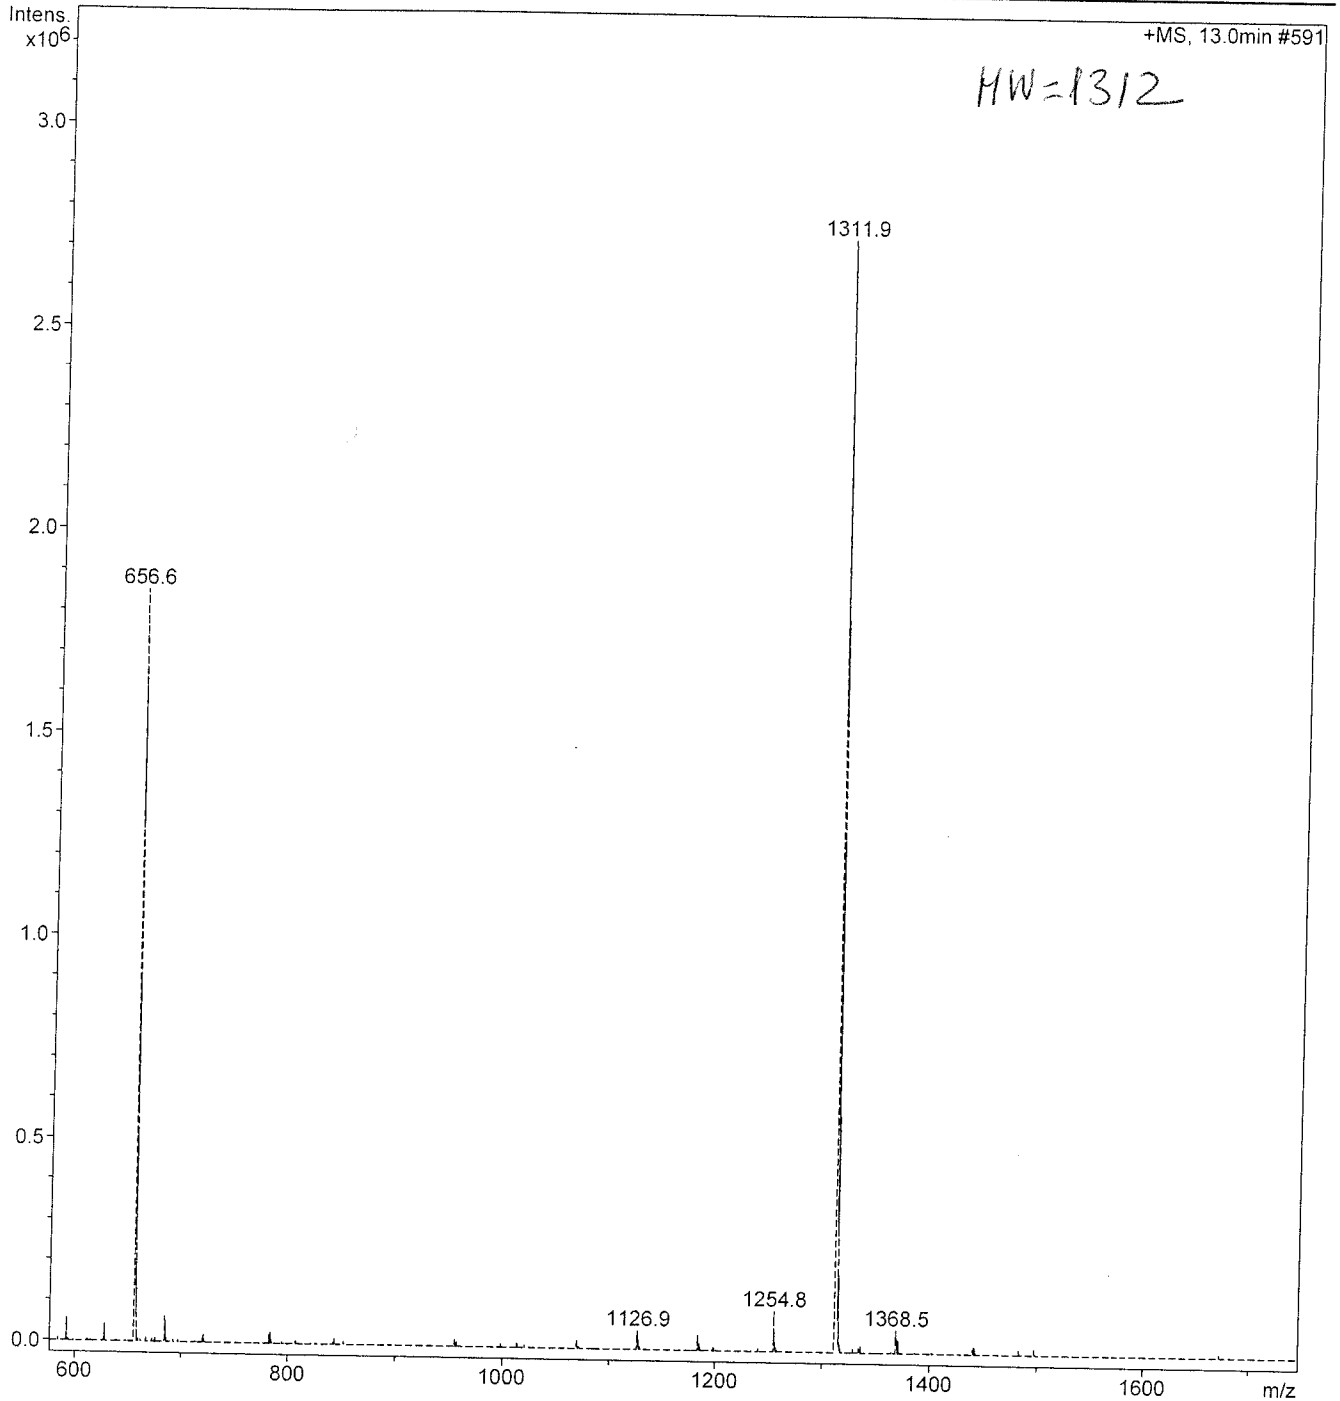

# H4K12ac (4-17) HPLC report

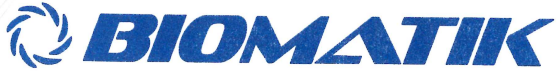

**Biomatik**  
Tel: (519) 489-7195, (800) 836-8089  
Fax: (519) 231-0140, (877) 221-3515  
Email: info@biomatik.com  
http://www.biomatik.com

## HPLC REPORT

Sample Description:

Structure: H4(4-17)K12ac GR-14

Lot No: P180117-CL633697

Column: 4.6mm\*250mm, Inertsil ODS-SP

Solvent A: 0.1% Trifluoroacetic in 100% Acetonitrile

Solvent B: 0.1% Trifluoroacetic in 100% Water

Gradient:

|          | A    | B   |
|----------|------|-----|
| 0.01min  | 5%   | 95% |
| 25.00min | 30%  | 70% |
| 25.01min | 100% | 0%  |
| 30.00min | Stop |     |

Flow rate: 1.0ml/min

Wavelength: 220nm

Volume: 10 µl

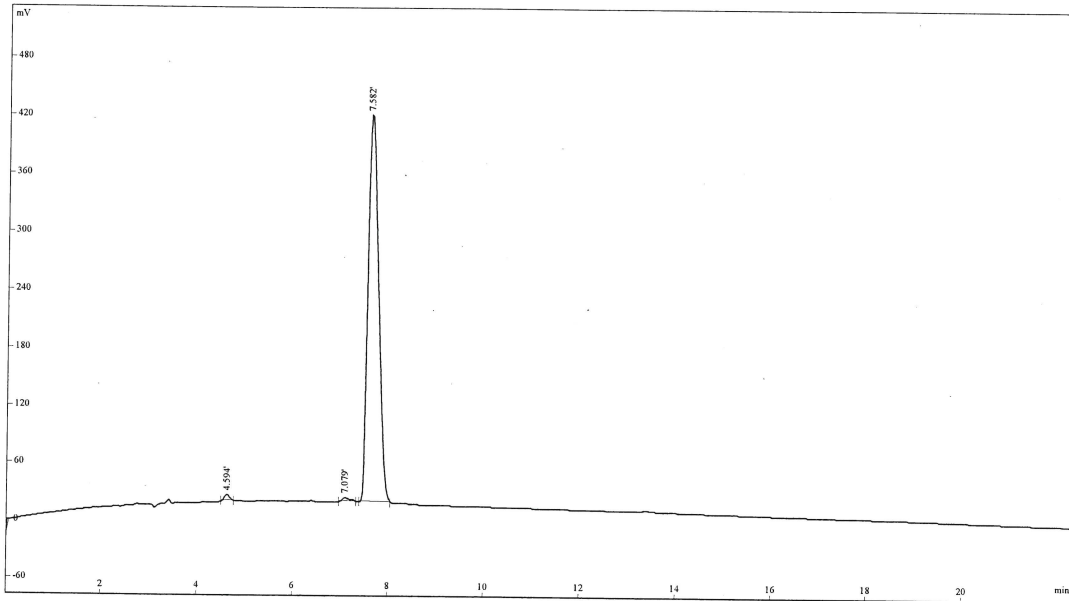

| Rank  | Time  | Conc.  | Area    | Height |
|-------|-------|--------|---------|--------|
| 1     | 4.594 | 0.7907 | 49364   | 6442   |
| 2     | 7.079 | 0.7209 | 45008   | 3761   |
| 3     | 7.582 | 98.49  | 6148640 | 402218 |
| Total |       | 100    | 6243012 | 412421 |

# H4K12ac (4-17) MS report

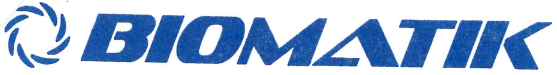

**Biomatik**

Tel: (519) 489-7195, (800) 836-8089

Fax: (519) 231-0140, (877) 221-3515

Email: info@biomatik.com

http://www.biomatik.com

## MS REPORT

25-Jan-2018

16:55:59

H4(4-17)K12ac P180117-CL633697 MW:1311.56

180125-GR-14 171 (3.161)

Probe: ESI  
Cone: 50v  
Desolvation Temp :350

Capillary:3.00KV  
Extractor: 5v  
Gas Flow : 350  
Scan ES+  
6.08e6

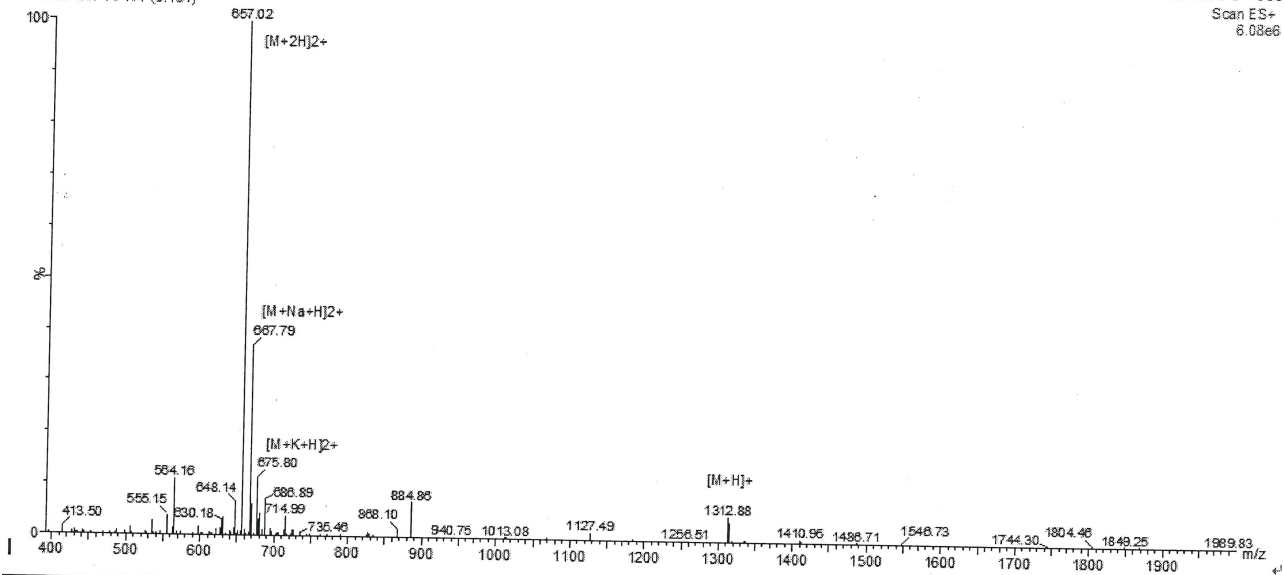



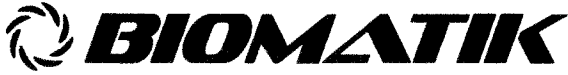

## HPLC Report

Sample Description:

Structure:H4 SA-15

Lot NO. :P170620-MJ589927

Column:250\*4.6mm, Boston Green ODS-AQ

Solvent A:0.1%TFA in 100%water

Solvent B:0.1%TFA in 100%acetonitrile

|            |    |     |
|------------|----|-----|
| Gradient : | A  | B   |
| 0.1min     | 92 | 8   |
| 25min      | 67 | 33  |
| 25.01min   | 0  | 100 |
| 30min      | 0  | 100 |

Flow rate:1.0ml/min

Wavelength(nm) :220

Volume:10ul

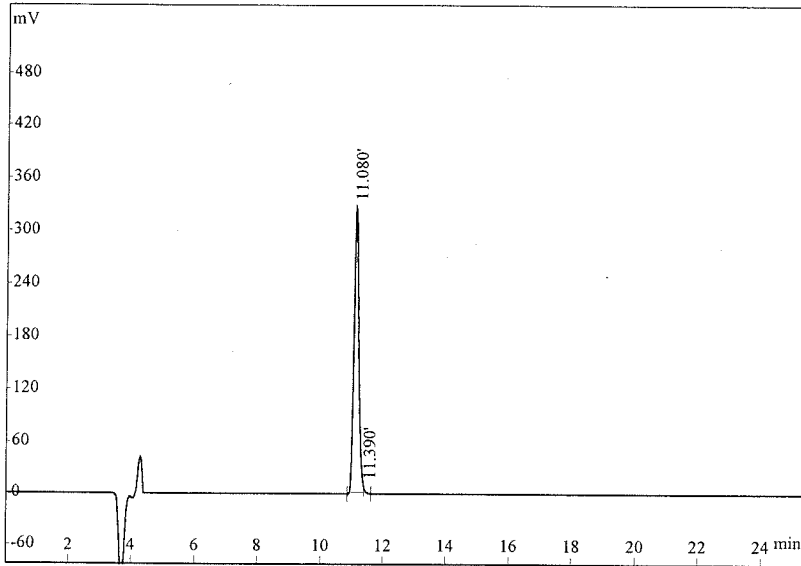

| Rank  | Time   | Conc.  | Area    | Height |
|-------|--------|--------|---------|--------|
| 1     | 11.080 | 99.46  | 3541495 | 334837 |
| 2     | 11.390 | 0.5344 | 19030   | 5768   |
| Total |        | 100    | 3560525 | 340605 |

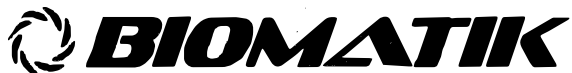

### Mass Spectrometry Report

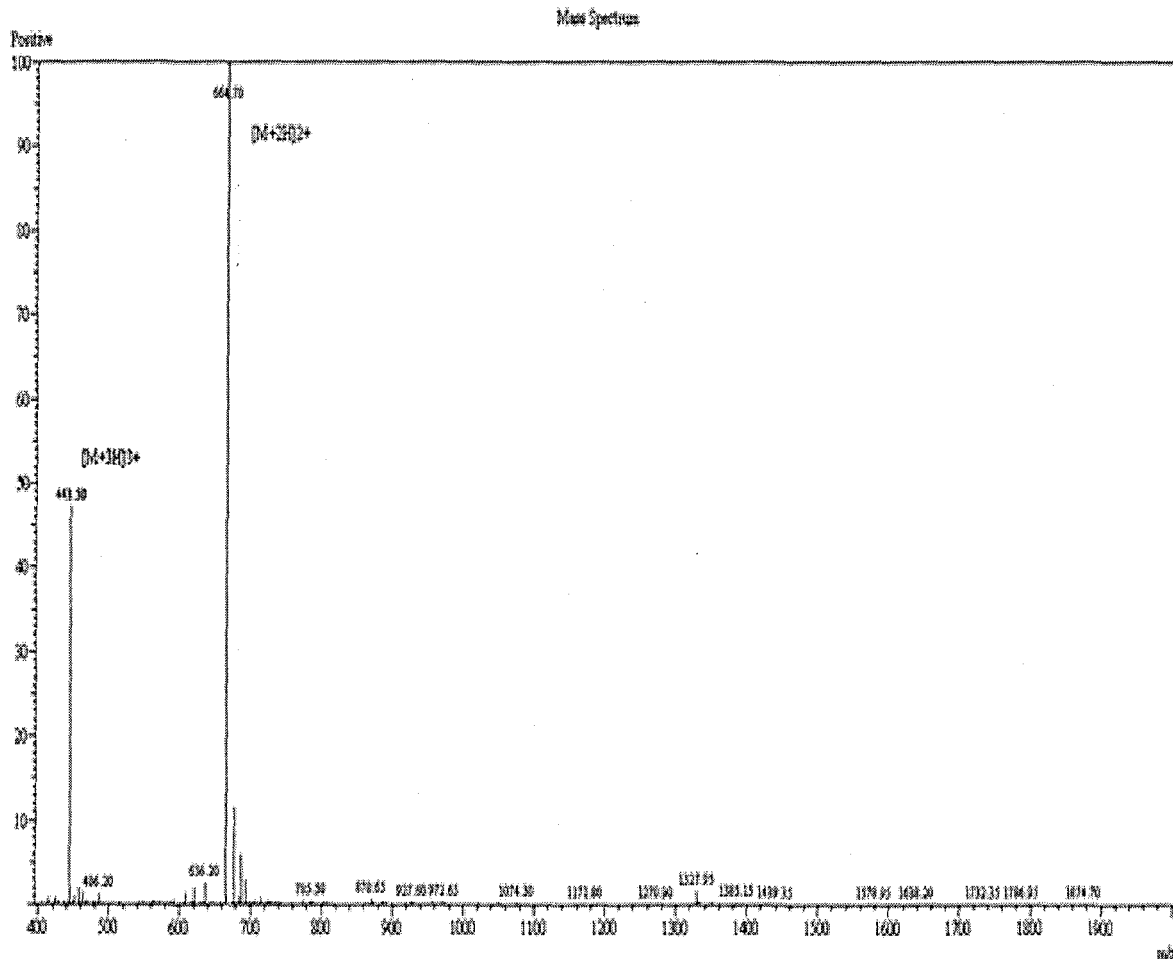

Sample Information  
 Date and Time: 2017-4-26 10:09:47  
 User: CHAD  
 Sample: H4 SA-15  
 Inj. Volume: 1  
 MW: 1327.52  
 Lot No.: P170620-MJ589927

Probe: ESI      Probe bias: -3 Skv  
 Nebulizer Gas Flow: 1 SL/min      Detector: 1.0kV  
 DL: -20.0v      T. Flow: 0.2nd/min  
 DL Temp: 250°C      B. conc: 50%H2O/50%ACN  
 Block Temp: 200°C

Sample Name: #5

H4K16ac (10-20) HPLC report

H4K16ac 10-20

```

=====
Acq. Operator   : dc                      Seq. Line :    8
Acq. Instrument : Instrument 1             Location  : P1-A-06
Injection Date  : 4/9/2015 3:13:23 PM    Inj       :    1
                                           Inj Volume: 4 µl
Acq. Method     : C:\Chem32\1\METHODS\DC1M.m
Last changed    : 4/9/2015 3:10:04 PM by dc
Analysis Method : C:\Chem32\1\METHODS\DC1M.m
Last changed    : 4/9/2015 3:36:18 PM by dc
    
```

NH<sub>2</sub>-LGKGGAK(Ac)RHRK-amide

4-09-15 purity >98%

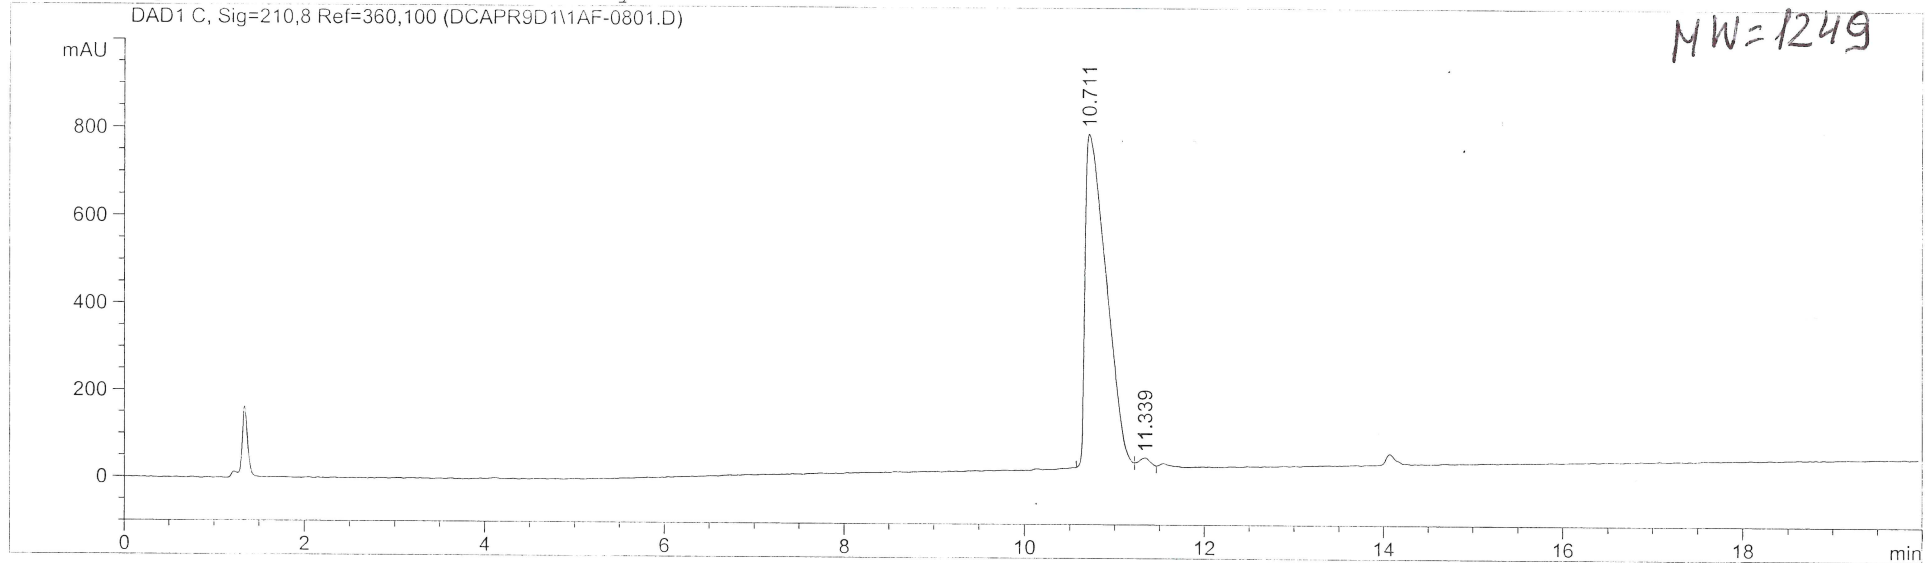

Area Percent Report

```

=====
Sorted By      : Signal
Multiplier     : 1.0000
Dilution       : 1.0000
Use Multiplier & Dilution Factor with ISTDs
    
```

Signal 1: DAD1 C, Sig=210,8 Ref=360,100

| Peak # | RetTime [min] | Type | Width [min] | Area [mAU*s] | Height [mAU] | Area %  |
|--------|---------------|------|-------------|--------------|--------------|---------|
| 1      | 10.711        | BV   | 0.2268      | 1.25051e4    | 764.80334    | 98.2841 |
| 2      | 11.339        | VV   | 0.1414      | 218.31677    | 22.85994     | 1.7159  |

Totals : 1.27234e4 787.66329

# H4K16ac (10-20) MS report

## Display Report - Selected Window Selected Analysis

**Analysis Name:** 1AF-0801.d  
**Method:** DC1M.m  
**Sample Name:** #5  
**Analysis Info:**

**Instrument:** LC-MSD-Trap-SL  
**Operator:** Hodges

**Print Date:** 4/9/2015 3:58:20 PM  
**Acq. Date:** 4/9/2015 3:12:56 PM

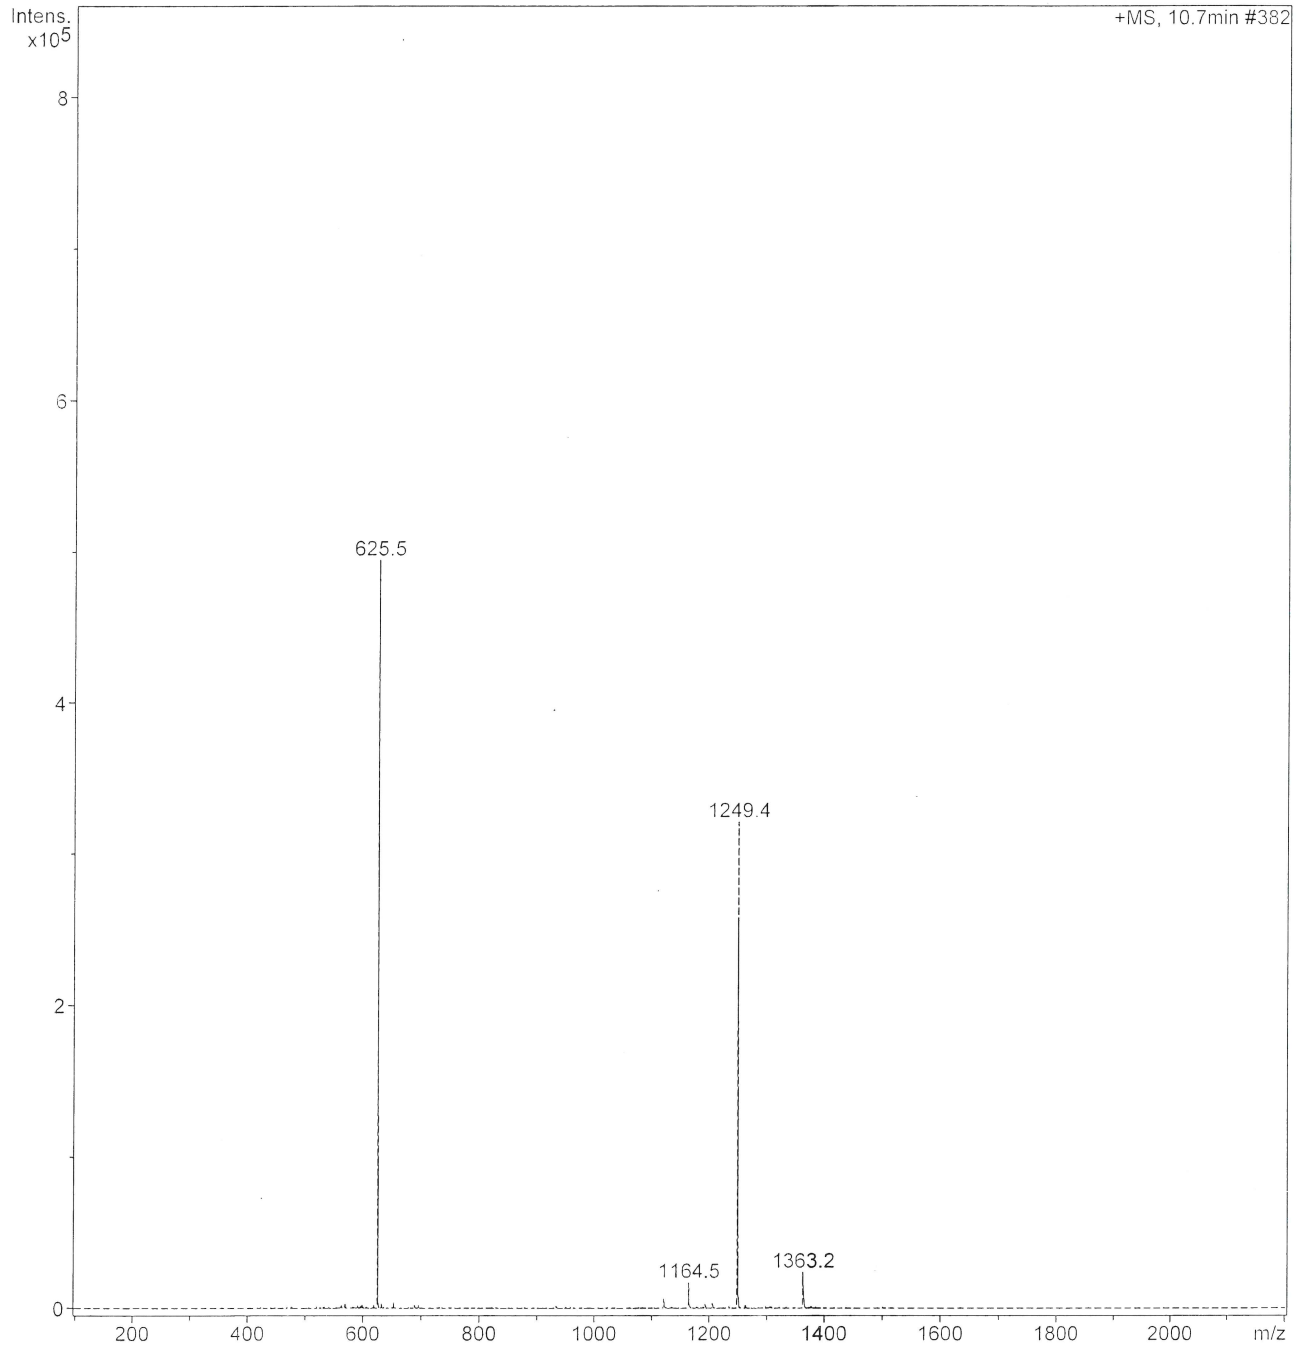

# H4K5acK8ac (1-10) HPLC report

Sample Name :H4K5acK8ac(1-10)  
 Sample ID :U3559EH260-3  
 Time Processed :8:35:14 AM  
 Month-Day-Year Processed :09/04/2019

Pump A : 0.065% trifluoroacetic in 100% water (v/v)  
 Pump B : 0.05% trifluoroacetic in 100% acetonitrile (v/v)  
 Total Flow:1 ml/min  
 Wavelength:220 nm

<<LC Time Program>>

| Time  | Module     | Command         | Value |
|-------|------------|-----------------|-------|
| 0.01  | Pumps      | Solvent B Conc. | 5     |
| 25.00 | Pumps      | Solvent B Conc. | 65    |
| 25.01 | Pumps      | Solvent B Conc. | 95    |
| 27.00 | Pumps      | Solvent B Conc. | 95    |
| 27.01 | Pumps      | Solvent B Conc. | 5     |
| 35.00 | Pumps      | Solvent B Conc. | 5     |
| 35.01 | Controller | Stop            |       |

<<Column Performance>>  
 <Detector A>  
 Column : Inertsil ODS-3 4.6 x 250 mm  
 Equipment:ZJ17010508

## <Chromatogram>

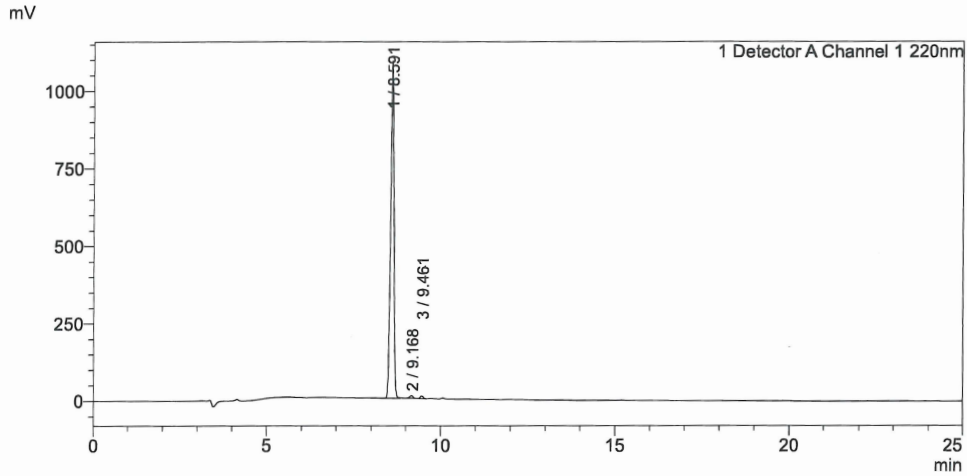

## <Peak Table>

Detector A Channel 1 220nm

| Peak# | Ret. Time | Area    | Height  | Area%   |
|-------|-----------|---------|---------|---------|
| 1     | 8.591     | 7220115 | 1087806 | 98.648  |
| 2     | 9.168     | 51513   | 8097    | 0.704   |
| 3     | 9.461     | 47441   | 8344    | 0.648   |
| Total |           | 7319069 | 1104247 | 100.000 |

# H4K5acK8ac (1-10) MS report

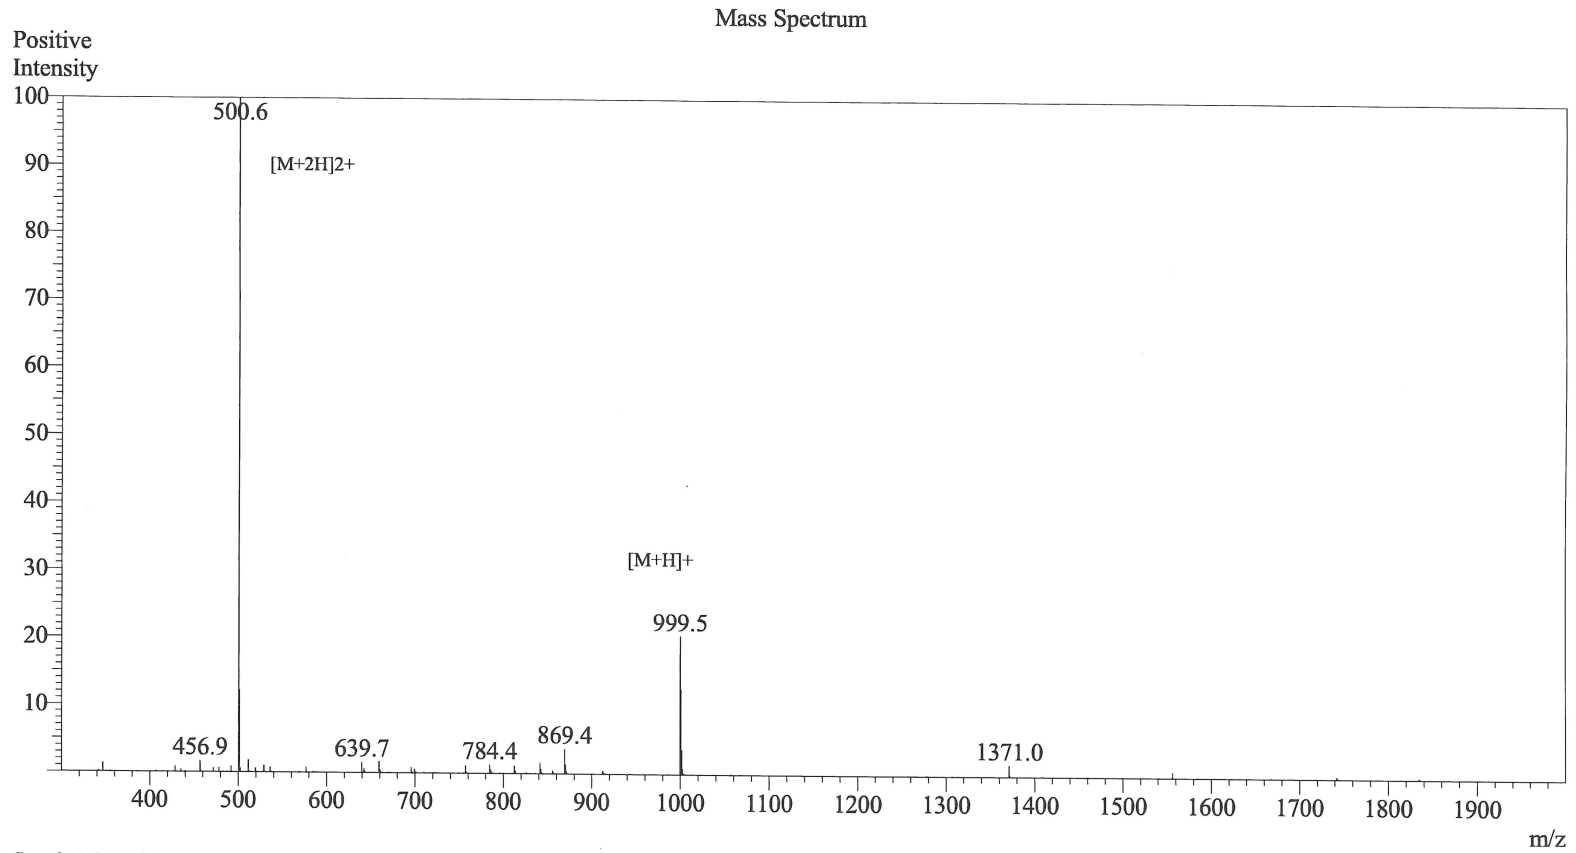

## Sample Information

Acquired by : Gary  
Month-Day Processed : 09/03/19  
Time Processed : 06:45:02 PM  
Injection Volume : 0.4  
Sample Name : H4K5acK8ac(1-10)  
Sample ID : U3559EH260-3  
Theoretical MW : 999.13  
Observed MW : 999.2

Interface : ESI  
Nebulizing Gas Flow : 1.5L/min  
CDL Temp : 250  
Block Temp : 200

Equipment : GK11010007  
Interface Bias : +4.5 kV  
Drying Gas Flow : 5 L/min  
T.Flow : 0.2 ml/min  
B.conc : 50%H2O/50%MeOH

# H4K5ac12ac (1-15) HPLC report

Sample Name :H4(1-15)K5acK12ac-A  
 Sample ID :U291REE170-3  
 Time Processed :2:50:51  
 Month-Day-Year Processed :06/13/2019

Pump A : 0.065% trifluoroacetic in 100% water (v/v)  
 Pump B : 0.05% trifluoroacetic in 100% acetonitrile (v/v)  
 Total Flow:1 ml/min  
 Wavelength:220 nm

| Time  | Unit       | Command      | Value | Comment |
|-------|------------|--------------|-------|---------|
| 0.01  | Pumps      | Pump B Conc. | 5     |         |
| 25.00 | Pumps      | Pump B Conc. | 65    |         |
| 25.01 | Pumps      | Pump B Conc. | 95    |         |
| 31.00 | Pumps      | Pump B Conc. | 95    |         |
| 31.01 | Pumps      | Pump B Conc. | 5     |         |
| 40.00 | Pumps      | Pump B Conc. | 5     |         |
| 40.01 | Controller | Stop         |       |         |

<<Column Performance>>

<Detector A>

Column : Inertsil ODS-3 4.6 x 250 mm  
 Equipment :SS-CM-0310

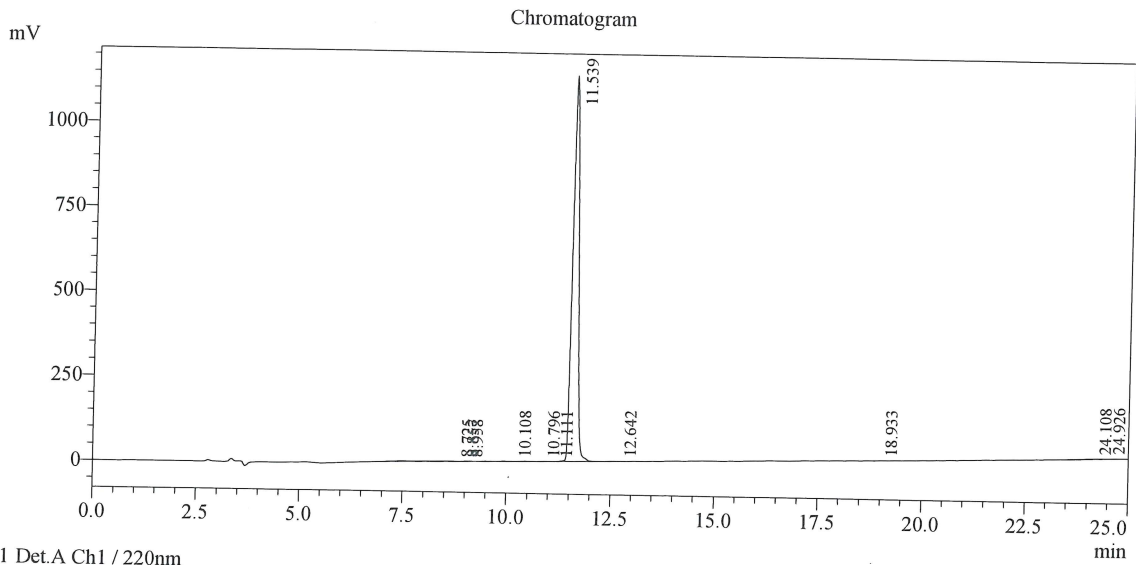

Peak Table

Detector A Ch1 220nm

| Peak# | Ret. Time | Area     | Height  | Area %  |
|-------|-----------|----------|---------|---------|
| 1     | 8.725     | 101018   | 826     | 0.874   |
| 2     | 8.857     | 4764     | 625     | 0.041   |
| 3     | 8.958     | 2870     | 485     | 0.025   |
| 4     | 10.108    | 28279    | 229     | 0.245   |
| 5     | 10.796    | 18063    | 457     | 0.156   |
| 6     | 11.111    | 3432     | 265     | 0.030   |
| 7     | 11.539    | 11331469 | 1136910 | 98.067  |
| 8     | 12.642    | 3893     | 190     | 0.034   |
| 9     | 18.933    | 2296     | 140     | 0.020   |
| 10    | 24.108    | 38861    | 1287    | 0.336   |
| 11    | 24.926    | 19904    | 473     | 0.172   |
| Total |           | 11554848 | 1141887 | 100.000 |

# H4K5ac12ac (1-15) MS report

## Mass Spectrum

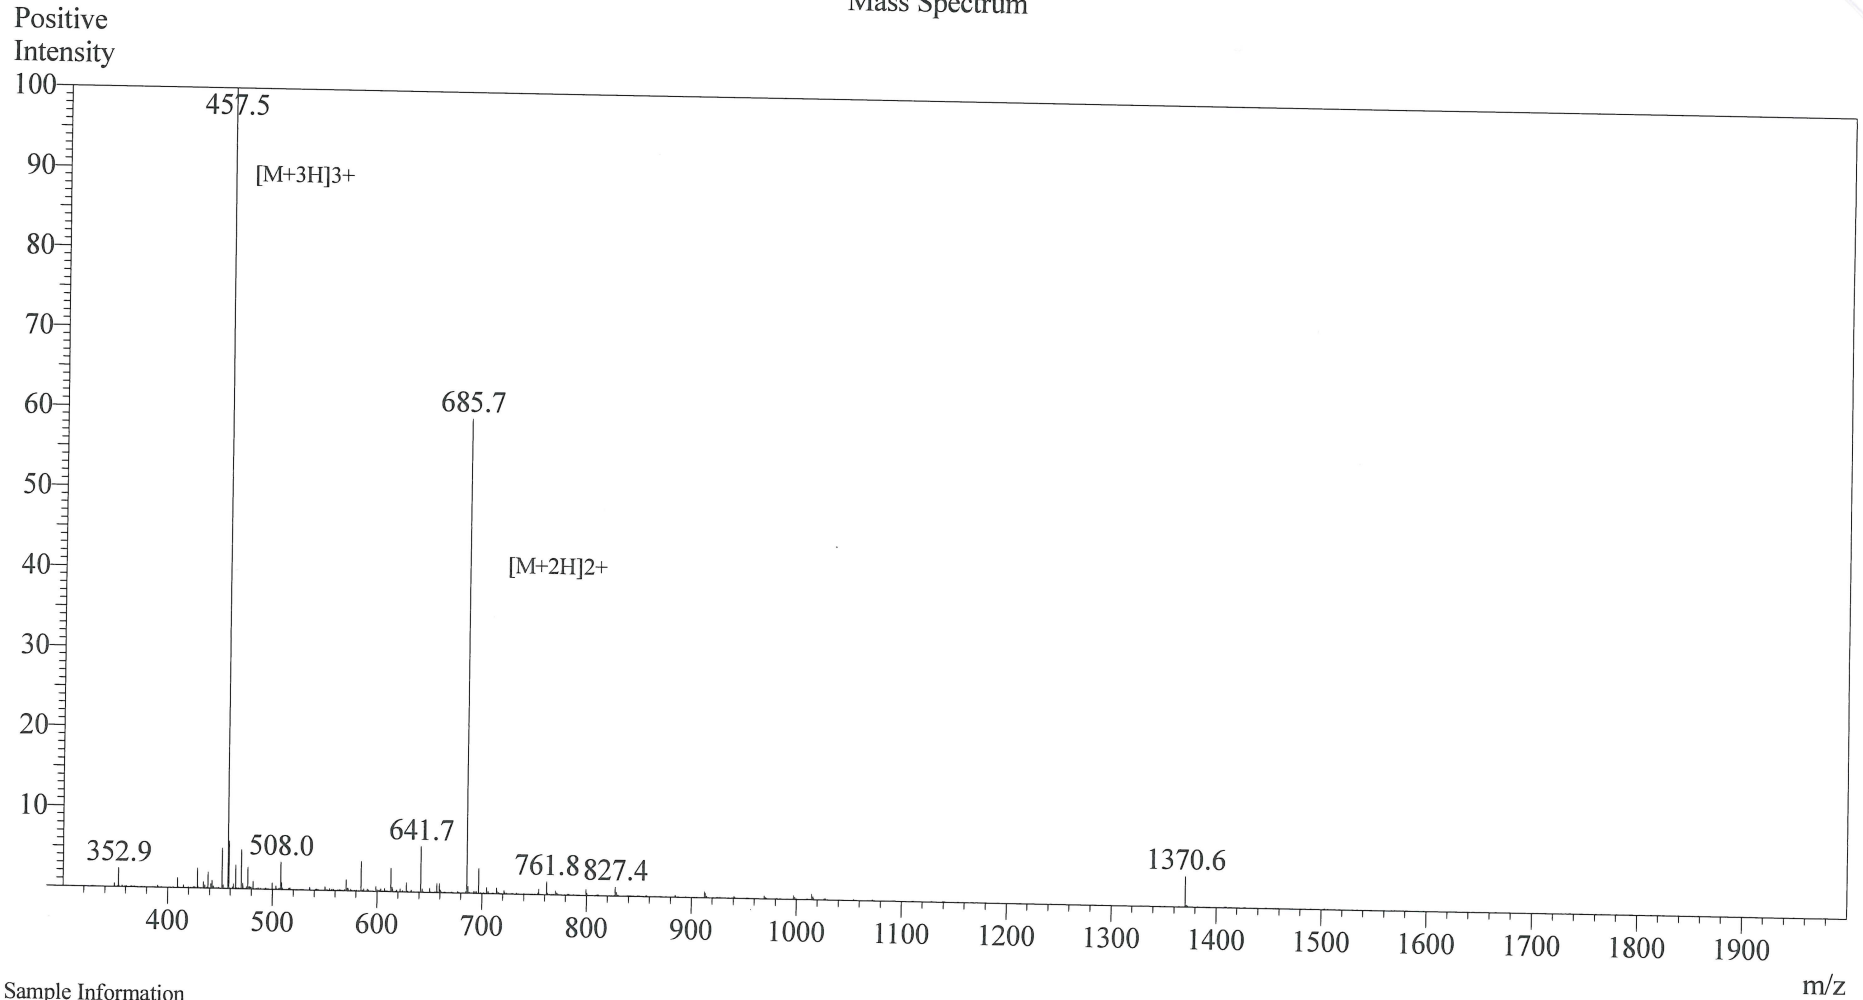

### Sample Information

Acquired by : Gary  
Month-Day Processed : 06/12/19  
Time Processed : 10:32:49 AM  
Injection Volume : 0.3  
Sample Name : H4(1-15)K5acK12ac-A  
Sample ID : U291REE170-3  
Theoretical MW : 1370.52  
Observed MW : 1369.5

Interface : ESI  
Nebulizing Gas Flow : 1.5L/min  
CDL Temp : 250  
Block Temp : 200

Equipment : GK11010007  
Interface Bias : +4.5 kV  
Drying Gas Flow : 5 L/min  
T.Flow : 0.2 ml/min  
B.conc : 50%H2O/50%MeOH



# H4K5ac16ac (1-24) HPLC report

Sample Name : H4K5acK16ac res 1-24  
 Sample ID : U7933DL110-1  
 Time Processed : 15:31:34  
 Month-Day-Year Processed : 12/22/2018

Sample Information

Pump A : 0.065% trifluoroacetic in 100% waters (v/v)  
 Pump B : 0.05% trifluoroacetic in 100% acetonitrile (v/v)

<<Pump>>  
 Flow : 1.0000 mL/min

<<Detector A>>  
 Wavelength Ch1 : 220 nm

<<LC Time Program>>

| Time  | Module     | Command         | Value | Comment |
|-------|------------|-----------------|-------|---------|
| 0.01  | Pumps      | Solvent B Conc. | 5     |         |
| 25.00 | Pumps      | Solvent B Conc. | 65    |         |
| 25.01 | Pumps      | Solvent B Conc. | 95    |         |
| 27.00 | Pumps      | Solvent B Conc. | 95    |         |
| 27.01 | Pumps      | Solvent B Conc. | 5     |         |
| 35.00 | Pumps      | Solvent B Conc. | 5     |         |
| 35.01 | Controller | Stop            |       |         |

<<Column Performance>>  
 <Detector A>  
 Column : Inertsil ODS-3 4.6 x 250 mm  
 Equipment: ZJ17010210

Chromatogram

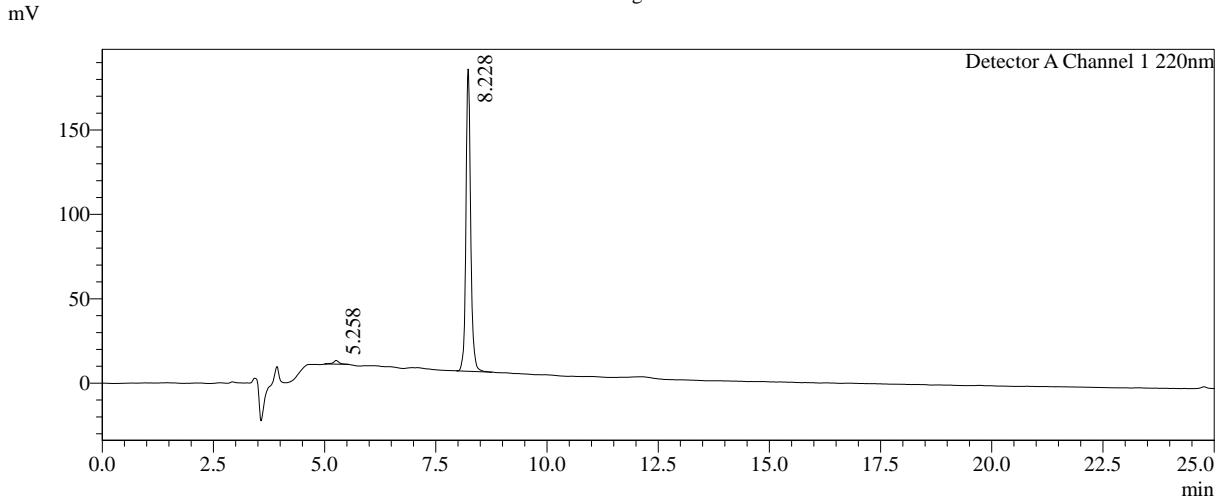

Peak Table

Detector A Channel 1 220nm

| Peak# | Ret. Time | Height | Area    | Area%   |
|-------|-----------|--------|---------|---------|
| 1     | 5.258     | 2192   | 20353   | 1.513   |
| 2     | 8.228     | 179137 | 1324964 | 98.487  |
| Total |           | 181328 | 1345317 | 100.000 |

H4K5ac16ac (1-24) MS report  
Mass Spectrum

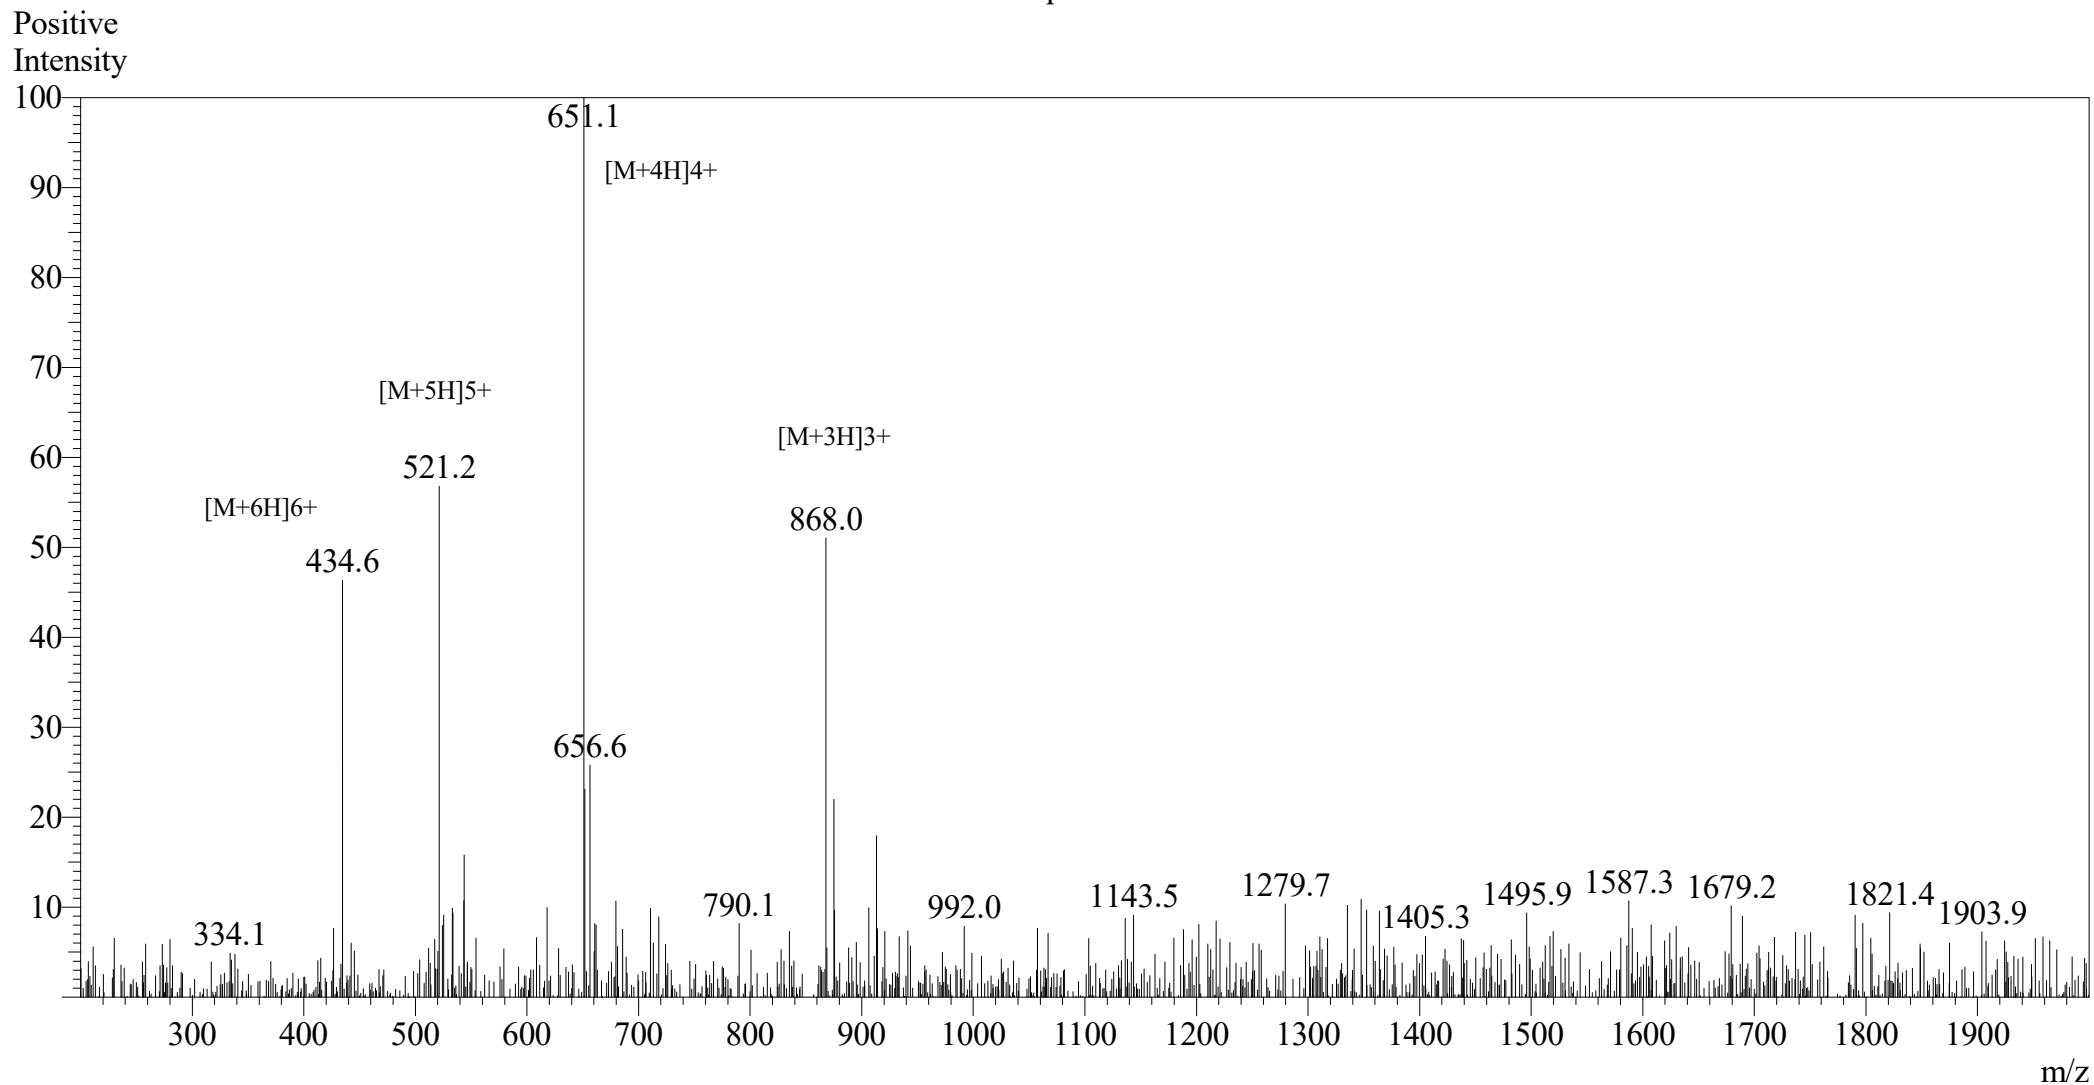

Sample Information

Acquired by : Gary  
Month-Day Processed : 12/21/18  
Time Processed : 08:04:06 PM  
Injection Volume : 0.1  
Sample Name : H4K5acK16ac res 1-24  
Sample ID : U7933DL110-1  
Theoretical MW : 2600.91  
Observed MW : 2600.4

Interface : ESI  
Nebulizing Gas Flow : 1.5L/min  
CDL Temp : 250  
Block Temp : 200

Equipment : GK11010007  
Interface Bias : +4.5 kV  
Drying Gas Flow : 5 L/min  
T.Flow : 0.2 ml/min  
B.conc : 50%H2O/50%MeOH

# H4K8ac12ac (6-15) HPLC report

Data File C:\CHEM32\1\DATA\DC05212017\1FC-0701.D

Sample Name: #4 pure

```
=====
Acq. Operator   : dc                               Seq. Line :    7
Acq. Instrument : Instrument 1                     Location  : P1-F-03
Injection Date  : 5/21/2017 11:45:16 AM           Inj       :    1
                                                    Inj Volume: 3 µl
Acq. Method     : C:\Chem32\1\METHODS\DC2M.m     NH2-GGK(Ac)GLGK(Ac)GGA-amide
Last changed    : 5/21/2017 11:43:28 AM by dc
Analysis Method : C:\Chem32\1\METHODS\DC2M.m     H4(6-15)K8acK12ac, purity>98%
Last changed    : 5/21/2017 5:57:01 PM by dc
=====
```

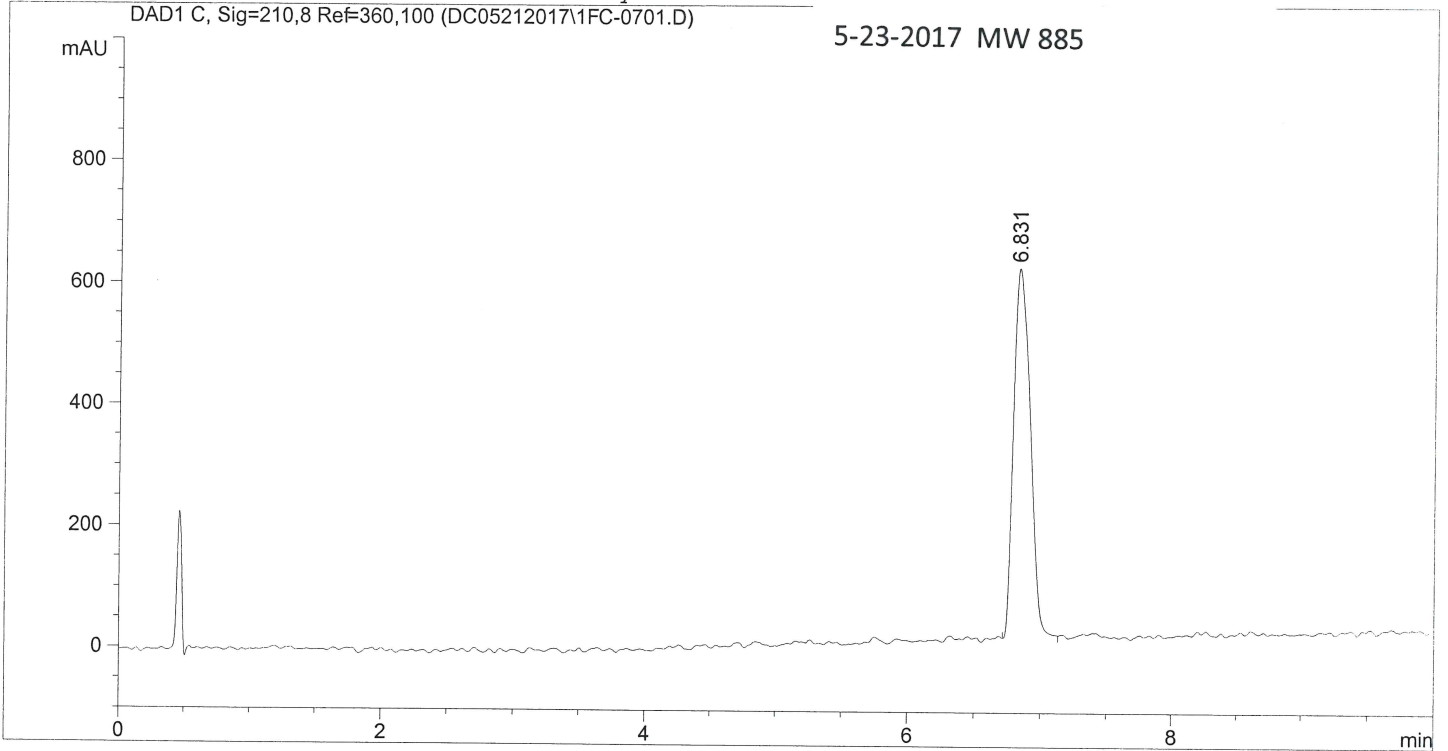

=====  
Area Percent Report  
=====

Sorted By : Signal  
Multiplier : 1.0000  
Dilution : 1.0000  
Use Multiplier & Dilution Factor with ISTDs

Signal 1: DAD1 C, Sig=210,8 Ref=360,100

| Peak # | RetTime [min] | Type | Width [min] | Area [mAU*s] | Height [mAU] | Area %   |
|--------|---------------|------|-------------|--------------|--------------|----------|
| 1      | 6.831         | VB   | 0.1313      | 5988.06836   | 638.97620    | 100.0000 |

Totals : 5988.06836 638.97620

=====  
\*\*\* End of Report \*\*\*

## Display Report - Selected Window Selected Analysis

**Analysis Name:** 1FC-0701.D

**Instrument:** LC-MSD-Trap-XCT

**Print Date:** 5/21/2017 5:58:15 PM

**Method:** DC2M.M

**Operator:** Hodges

**Acq. Date:** 5/21/2017 11:45:14 AM

**Sample Name:** #4 pure

**Analysis Info:**

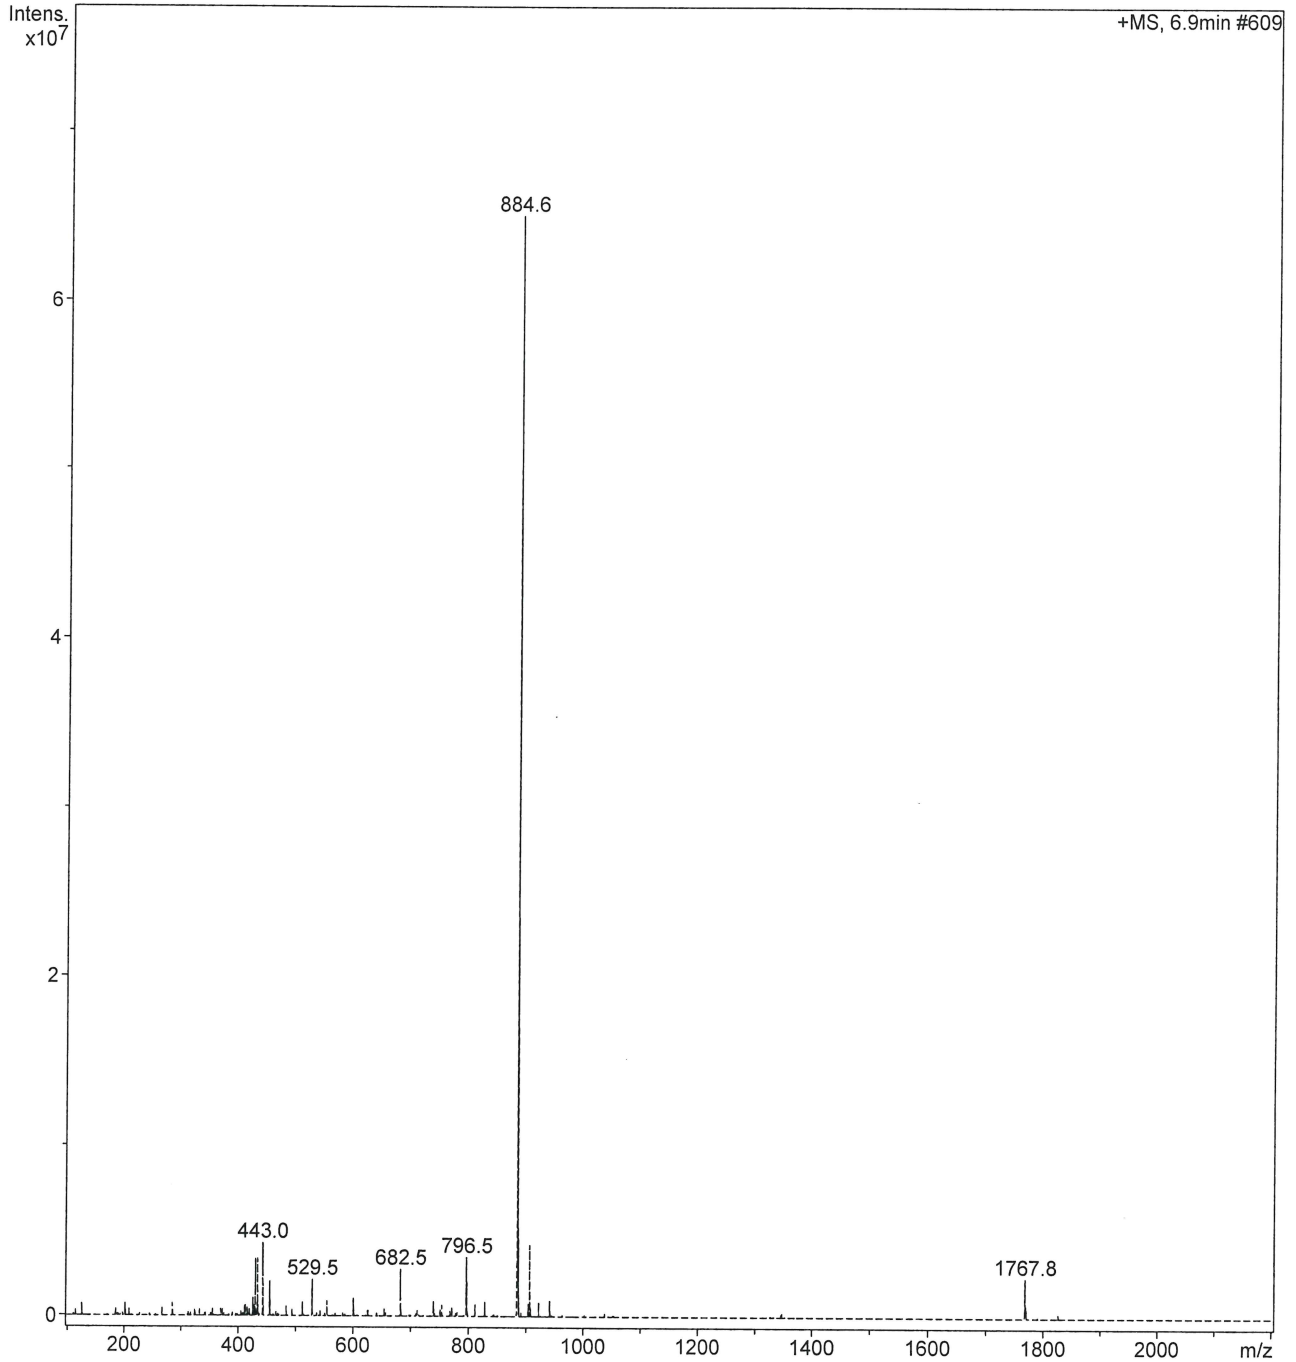

# H4K8ac16ac (1-20) HPLC report

Sample Name: H4K8acK16ac (res 1-20)  
 Sample ID: U931EEK130-1  
 Time Processed :13:17:34  
 Month-Day-Year Processed :11/23/2019

Pump A : 0.065% trifluoroacetic in 100% water (v/v)  
 Pump B : 0.05% trifluoroacetic in 100% acetonitrile (v/v)  
 Total Flow:1 ml/min  
 Wavelength:220 nm

| Time  | Unit       | Command       | Value | Comment |
|-------|------------|---------------|-------|---------|
| 0.01  | Pumps      | Pump A B.Conc | 5     |         |
| 25.00 | Pumps      | Pump A B.Conc | 65    |         |
| 25.01 | Pumps      | Pump A B.Conc | 95    |         |
| 32.00 | Pumps      | Pump A B.Conc | 95    |         |
| 32.01 | Pumps      | Pump A B.Conc | 5     |         |
| 40.00 | Pumps      | Pump A B.Conc | 5     |         |
| 40.00 | Controller | Stop          |       |         |

<<Column Performance>>  
 <Detector A>  
 Column : Inertsil ODS-3 4.6 x 250 mm  
 Equipment: GK1101009

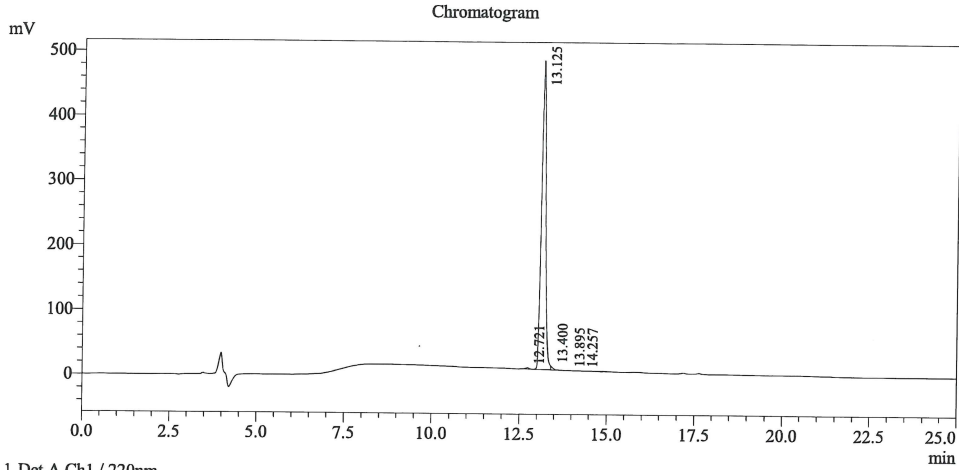

1 Det.A Ch1 / 220nm

Peak Table

| Peak# | Ret. Time | Area    | Height | Area %  |
|-------|-----------|---------|--------|---------|
| 1     | 12.721    | 18139   | 2080   | 0.434   |
| 2     | 13.125    | 4133139 | 476832 | 98.840  |
| 3     | 13.400    | 23275   | 5808   | 0.557   |
| 4     | 13.895    | 1355    | 216    | 0.032   |
| 5     | 14.257    | 5738    | 82     | 0.137   |
| Total |           | 4181647 | 485016 | 100.000 |

# H4K8ac16ac (1-20) MS report

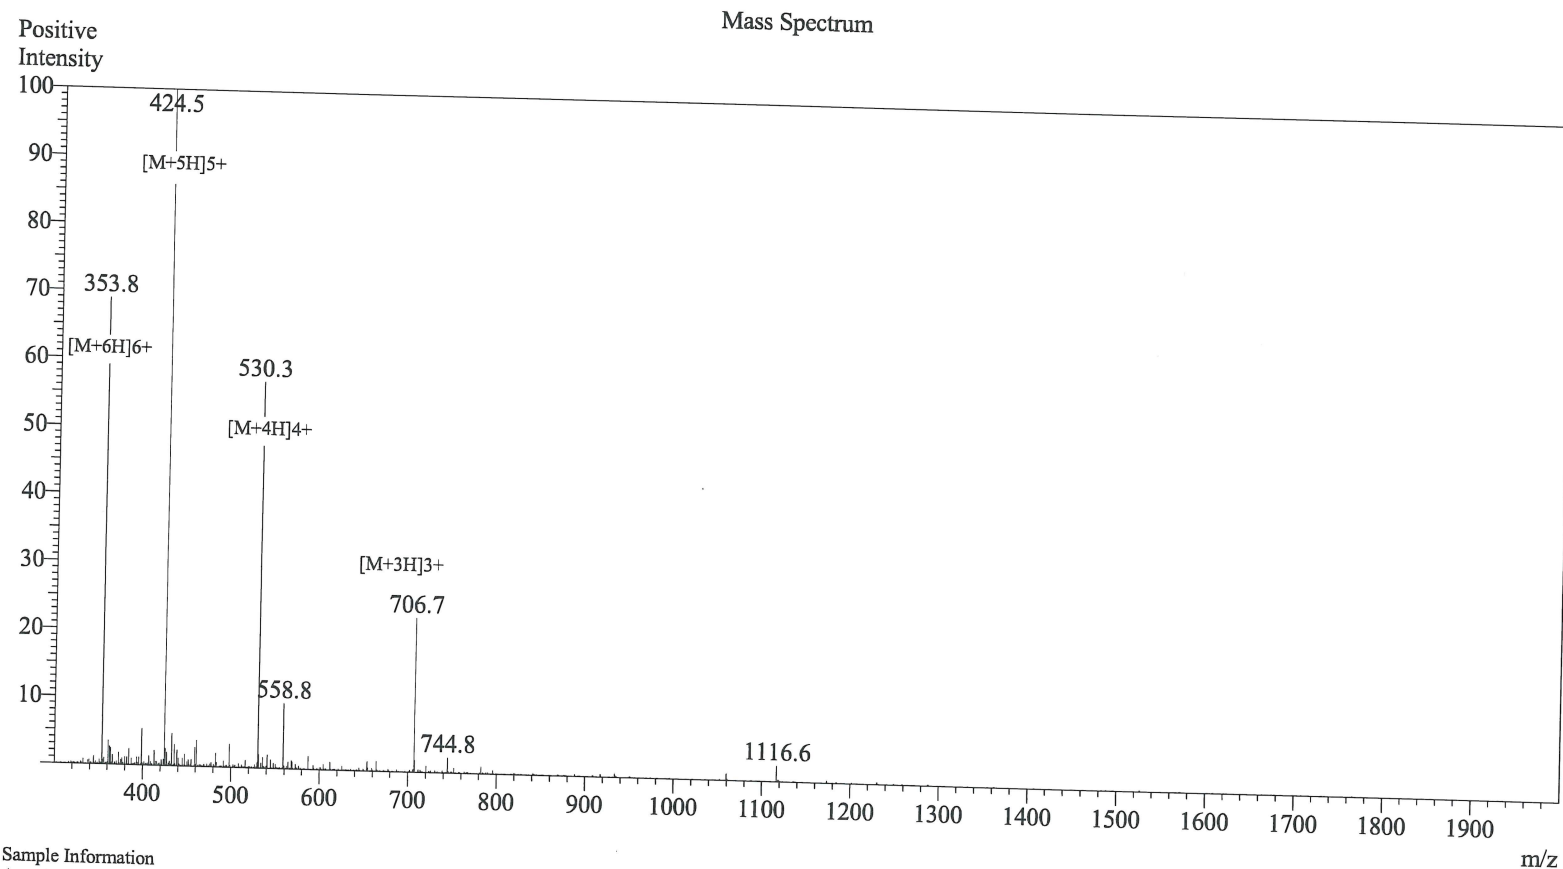

## Sample Information

Acquired by : Gary  
Month-Day Processed : 11/22/19  
Time Processed : 07:49:24 PM  
Injection Volume : 0.4  
Sample Name : H4K8acK16ac (res 1-20)  
Sample ID : U931EEK130-1  
Theoretical MW : 2117.42  
Observed MW : 2117.5

Interface : ESI  
Nebulizing Gas Flow : 1.5L/min  
CDL Temp : 250  
Block Temp : 200

Equipment : GK11010007  
Interface Bias : +4.5 kV  
Drying Gas Flow : 5 L/min  
T.Flow : 0.2 ml/min  
B.conc : 50%H2O/50%MeOH

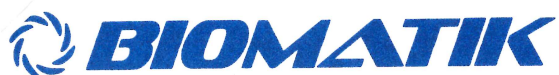

**Biomatik**  
 Tel: (519) 489-7195, (800) 836-8089  
 Fax: (519) 231-0140, (877) 221-3515  
 Email: info@biomatik.com  
 http://www.biomatik.com

## HPLC Report

Structure : H4 LK-11  
 Lot No : P170620-MJ589926  
 Column : 4.6mm\*250mm, Kromasil 100-5 C18  
 Solvent A : 0.1% trifluoroacetic in 100% acetonitrile  
 Solvent B : 0.1% trifluoroacetic in 100% water  
 Gradient :           A           B  
           0.01min  5%           95%  
           25min   30%          70%  
           25.1min 100%         0%  
           30.0min           STOP

Flow rate : 1.0ml/min  
 Wavelength : 220nm  
 Volume : 5ul

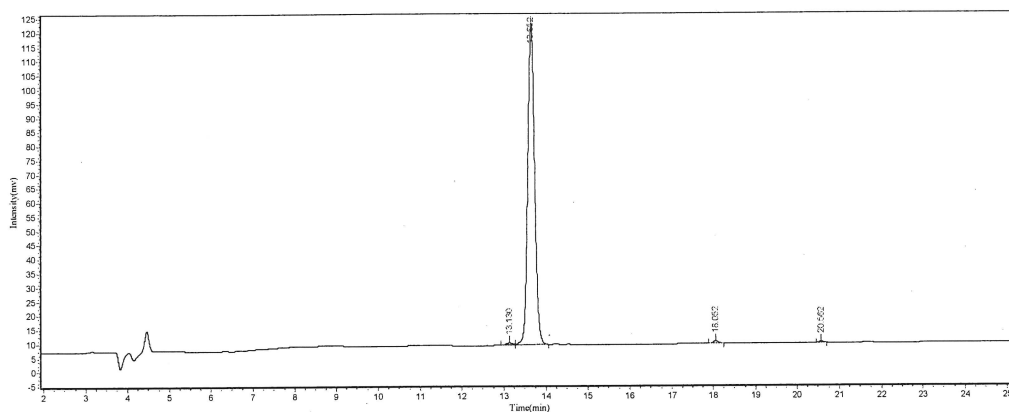

| Peak No. | Ret Time | Height     | Area        | Conc.    |
|----------|----------|------------|-------------|----------|
| 1        | 13.130   | 804.222    | 8519.718    | 0.6521   |
| 2        | 13.652   | 113478.391 | 1287781.125 | 98.5605  |
| 3        | 18.052   | 857.111    | 7259.892    | 0.5556   |
| 4        | 20.562   | 404.389    | 3028.215    | 0.2318   |
| Total    |          |            |             | 100.0000 |

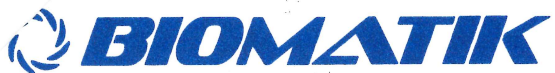

**Biomatik**  
 Tel: (519) 489-7195, (800) 836-8089  
 Fax: (519) 231-0140, (877) 221-3515  
 Email: info@biomatik.com  
 http://www.biomatik.com

Mass Spectrometry Report

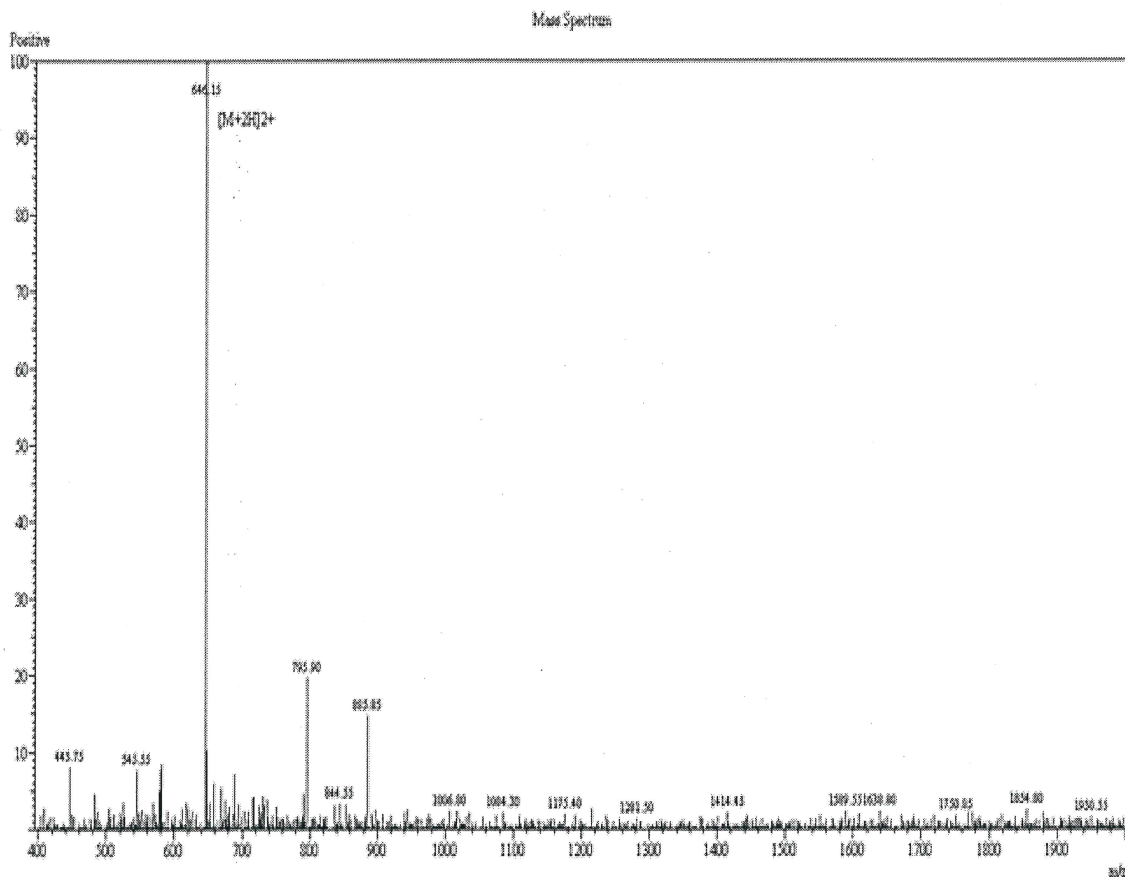

Sample Information  
 Date and Time : 2017-6-27 13:30:21  
 User : CHAO  
 Sample : H4 LK-11  
 Inj. Volume : 1  
 MW : 1290.55  
 Lot No. : P170620-MJ589926

Probe : ESI Probe bias : -3.5kV  
 Nebulizer Gas Flow : 1.5L/min Detector : 1.0eV  
 DL : -20.0v T. Flow : 0.2ml/min  
 DL Temp : 250°C B. conc : 50%H2O/50%ACN  
 Block Temp : 200°C





# Display Report - Selected Window Selected Analysis

**Analysis Name:** 003-0501.D    **Instrument:** LC-MSD-Trap-SL    **Print Date:** 5/9/2011 3:43:22 PM  
**Method:** DC1M.M    **Operator:** Hodges    **Acq. Date:** 5/6/2011 5:01:31 PM  
**Sample Name:** H3 nat. pure  
**Analysis Info:** Zorbax C18 300SB SN USFS003194  
15-30%B over 15min  
WJH3002 Control Peptide for D16

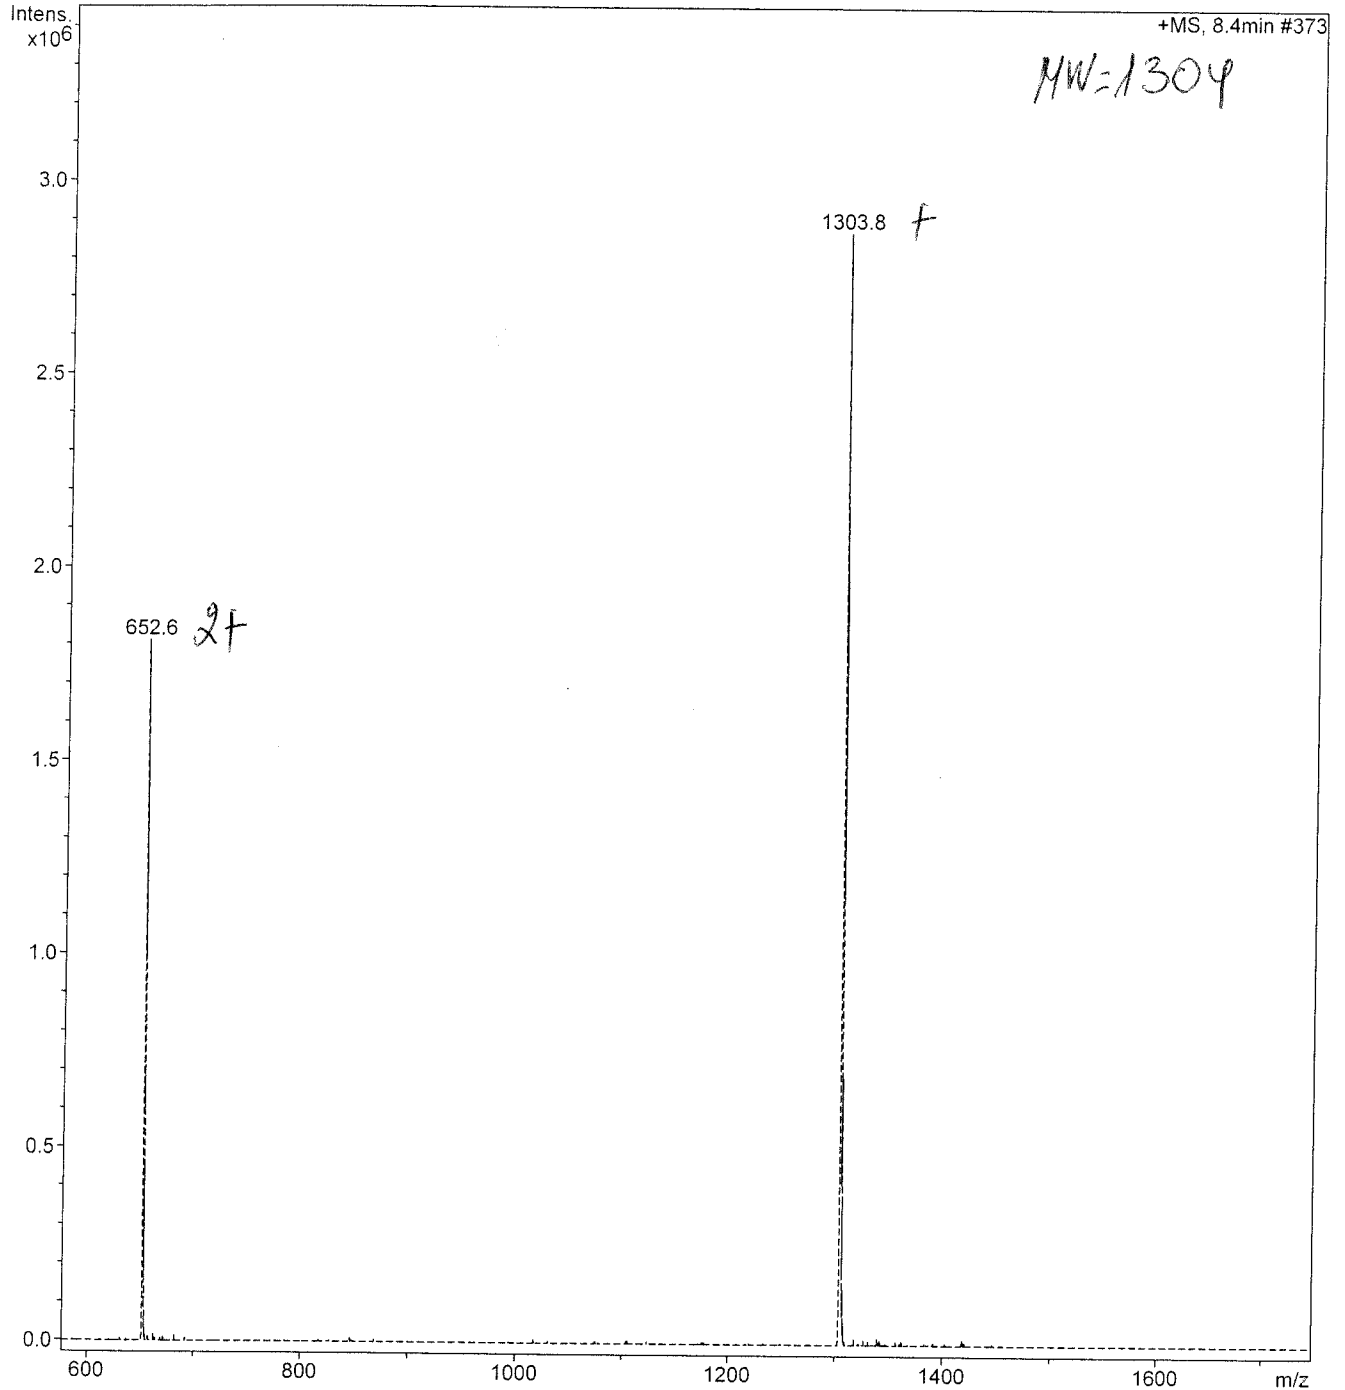

Sample Name: K9Ac pure

H3K9ac (1-12) HPLC report

Acq. Operator : WH Seq. Line : 4  
 Acq. Instrument : Instrument 1 Location : Vial 2  
 Injection Date : 5/6/2011 4:33:07 PM Inj : 1  
 Inj Volume : 6 µl

Acq. Method : C:\Chem32\1\METHODS\DC1M.M  
 Last changed : 5/6/2011 4:29:34 PM by WH  
 Analysis Method : C:\Chem32\1\METHODS\15MINAT50C.M  
 Last changed : 5/9/2011 9:42:28 AM by WH  
 Sample Info : Zorbax C18 300SB SN USFS0031

NH<sub>2</sub>-ARTKQTARKSTG-amide  
 5/06/11 H3(1-12)K9Ac  
 Purity>96%

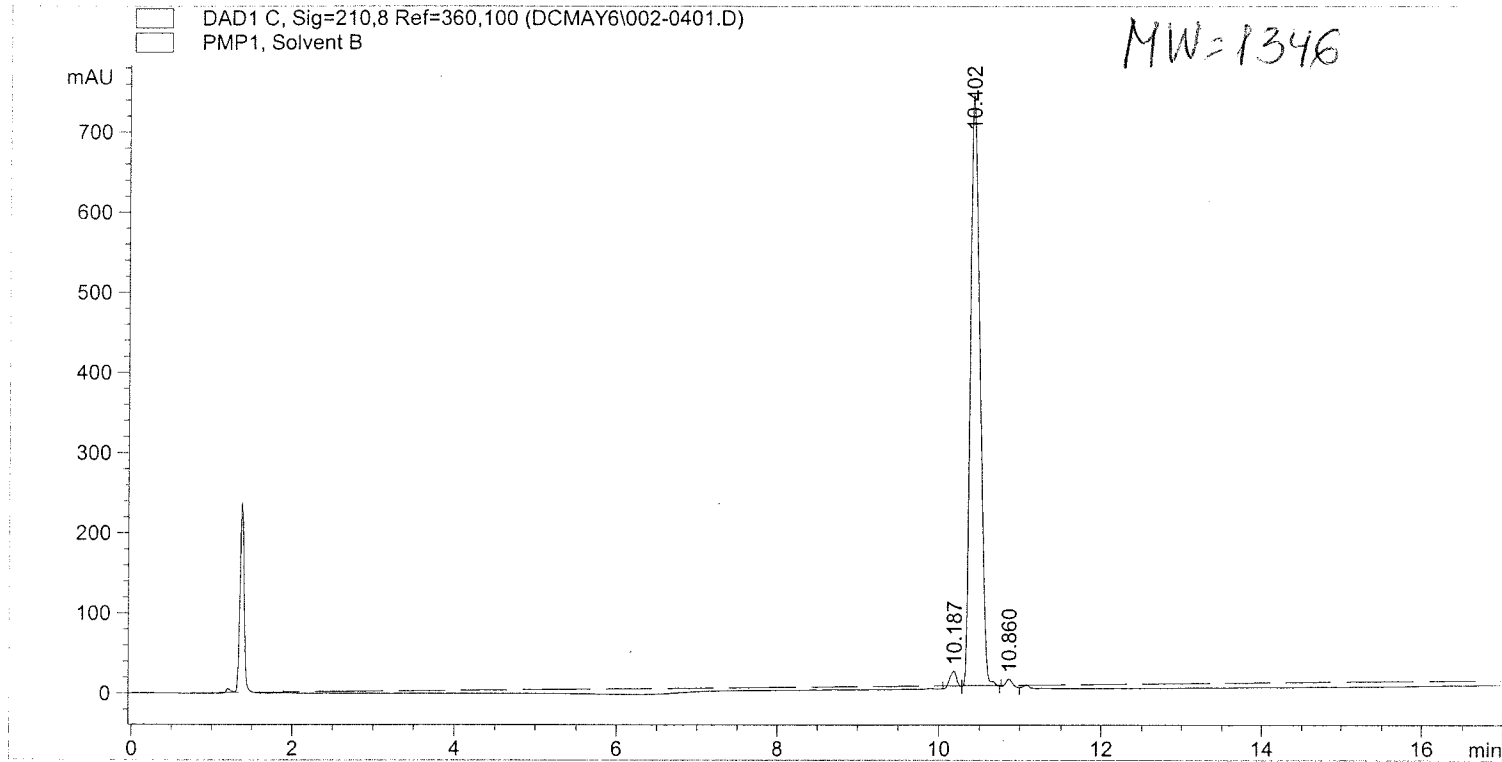

Area Percent Report

Sorted By : Signal  
 Multiplier : 1.0000  
 Dilution : 1.0000  
 Use Multiplier & Dilution Factor with ISTDs

Signal 1: DAD1 C, Sig=210,8 Ref=360,100

| Peak # | RetTime [min] | Type | Width [min] | Area [mAU*s] | Height [mAU] | Area %  |
|--------|---------------|------|-------------|--------------|--------------|---------|
| 1      | 10.187        | BV   | 0.1007      | 133.63661    | 22.03868     | 2.1583  |
| 2      | 10.402        | VB   | 0.1261      | 5978.96338   | 741.55469    | 96.5632 |
| 3      | 10.860        | BV   | 0.0972      | 79.16403     | 11.96026     | 1.2785  |

Totals : 6191.76402 775.55363

\*\*\* End of Report \*\*\*

# Display Report - Selected Window Selected Analysis

**Analysis Name:** 002-0401.D    **Instrument:** LC-MSD-Trap-SL    **Print Date:** 5/9/2011 3:35:54 PM  
**Method:** DC1M.M    **Operator:** Hodges    **Acq. Date:** 5/6/2011 4:33:01 PM  
**Sample Name:** K9Ac pure  
**Analysis Info:** Zorbax C18 300SB SN USFS003194  
20-80%B over 30min

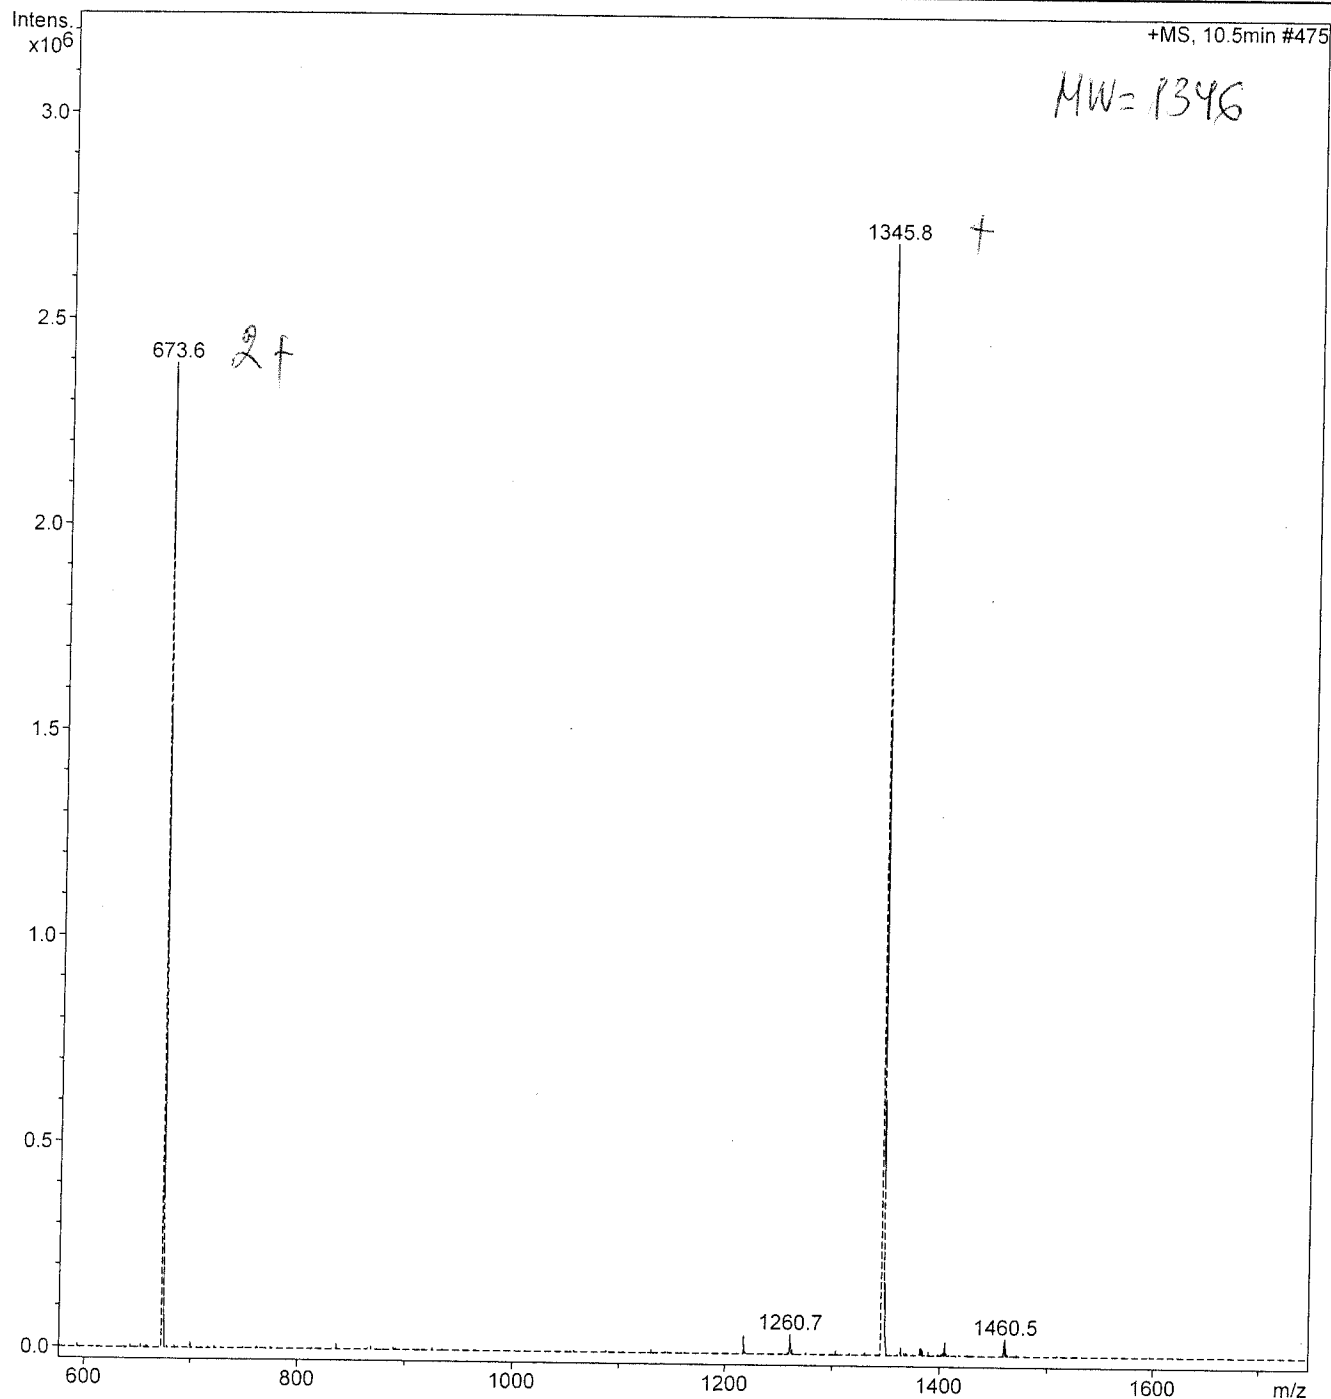

# H3K14ac (8-19) HPLC report

Data File C:\CHEM32\1\DATA\DC05202017\1CB-3101.D

Sample Name: #1 pure

```
=====
Acq. Operator   : dc                               Seq. Line :   31
Acq. Instrument : Instrument 1                     Location  : P1-C-02
Injection Date  : 5/20/2017 7:53:18 PM           Inj       :    1
                                                    Inj Volume: 3 µl
Different Inj Volume from Sequence !      Actual Inj Volume : 5 µl
Acq. Method     : C:\Chem32\1\METHODS\DC2M.M
Last changed    : 5/20/2017 7:50:55 PM by dc
Analysis Method  : C:\Chem32\1\METHODS\30MINWASH50C.M
Last changed    : 5/21/2017 8:24:21 AM by dc
=====
```

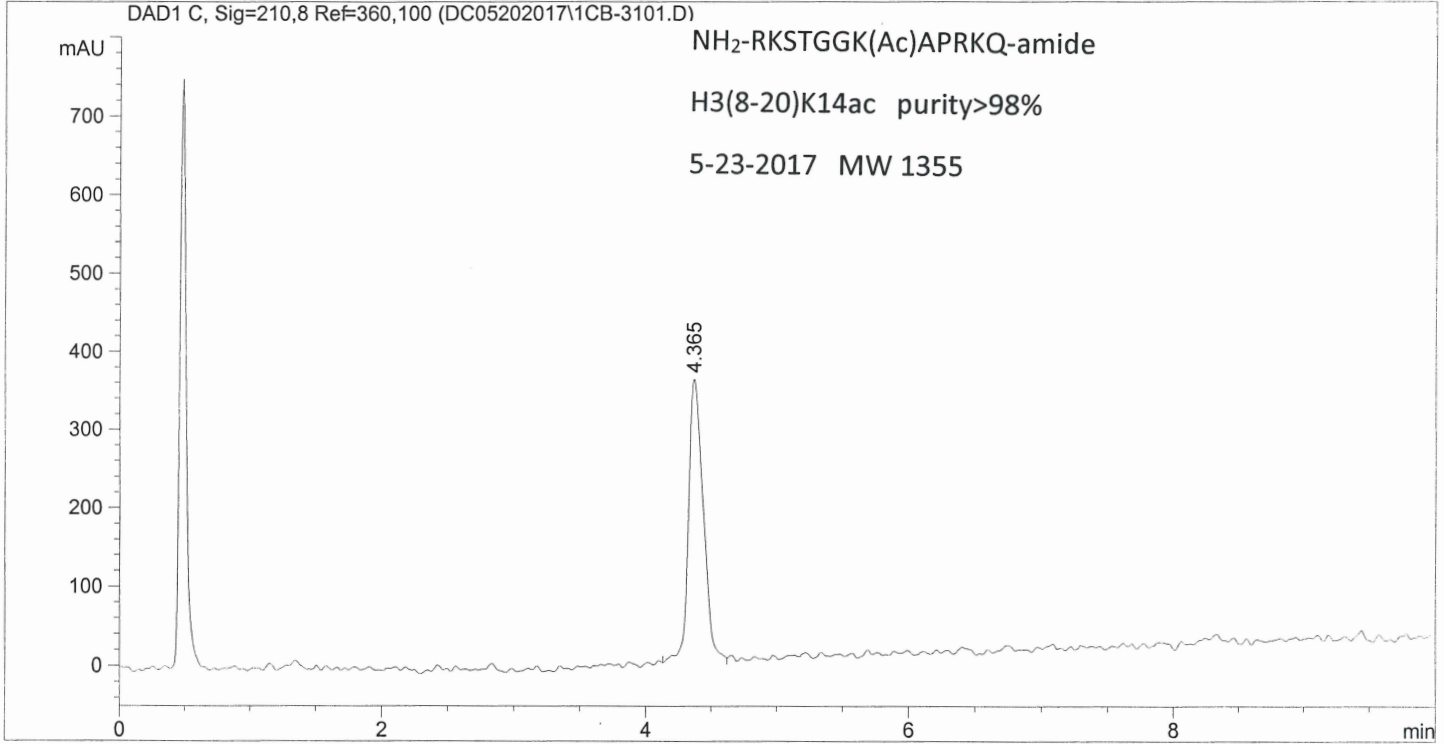

=====  
Area Percent Report  
=====

```
Sorted By      :      Signal
Multiplier     :      1.0000
Dilution       :      1.0000
Use Multiplier & Dilution Factor with ISTDs
```

Signal 1: DAD1 C, Sig=210,8 Ref=360,100

| Peak # | RetTime [min] | Type | Width [min] | Area [mAU*s] | Height [mAU] | Area %   |
|--------|---------------|------|-------------|--------------|--------------|----------|
| 1      | 4.365         | VV   | 0.1261      | 3208.54541   | 373.84125    | 100.0000 |

Totals :                    3208.54541   373.84125

=====  
\*\*\* End of Report \*\*\*

# H3K14ac (8-19) MS report

## Display Report - Selected Window Selected Analysis

**Analysis Name:** 1CB-3101.D    **Instrument:** LC-MSD-Trap-XCT    **Print Date:** 5/21/2017 8:25:59 AM  
**Method:** DC2M.M    **Operator:** Hodges    **Acq. Date:** 5/20/2017 7:53:19 PM  
**Sample Name:** #1 pure  
**Analysis Info:**

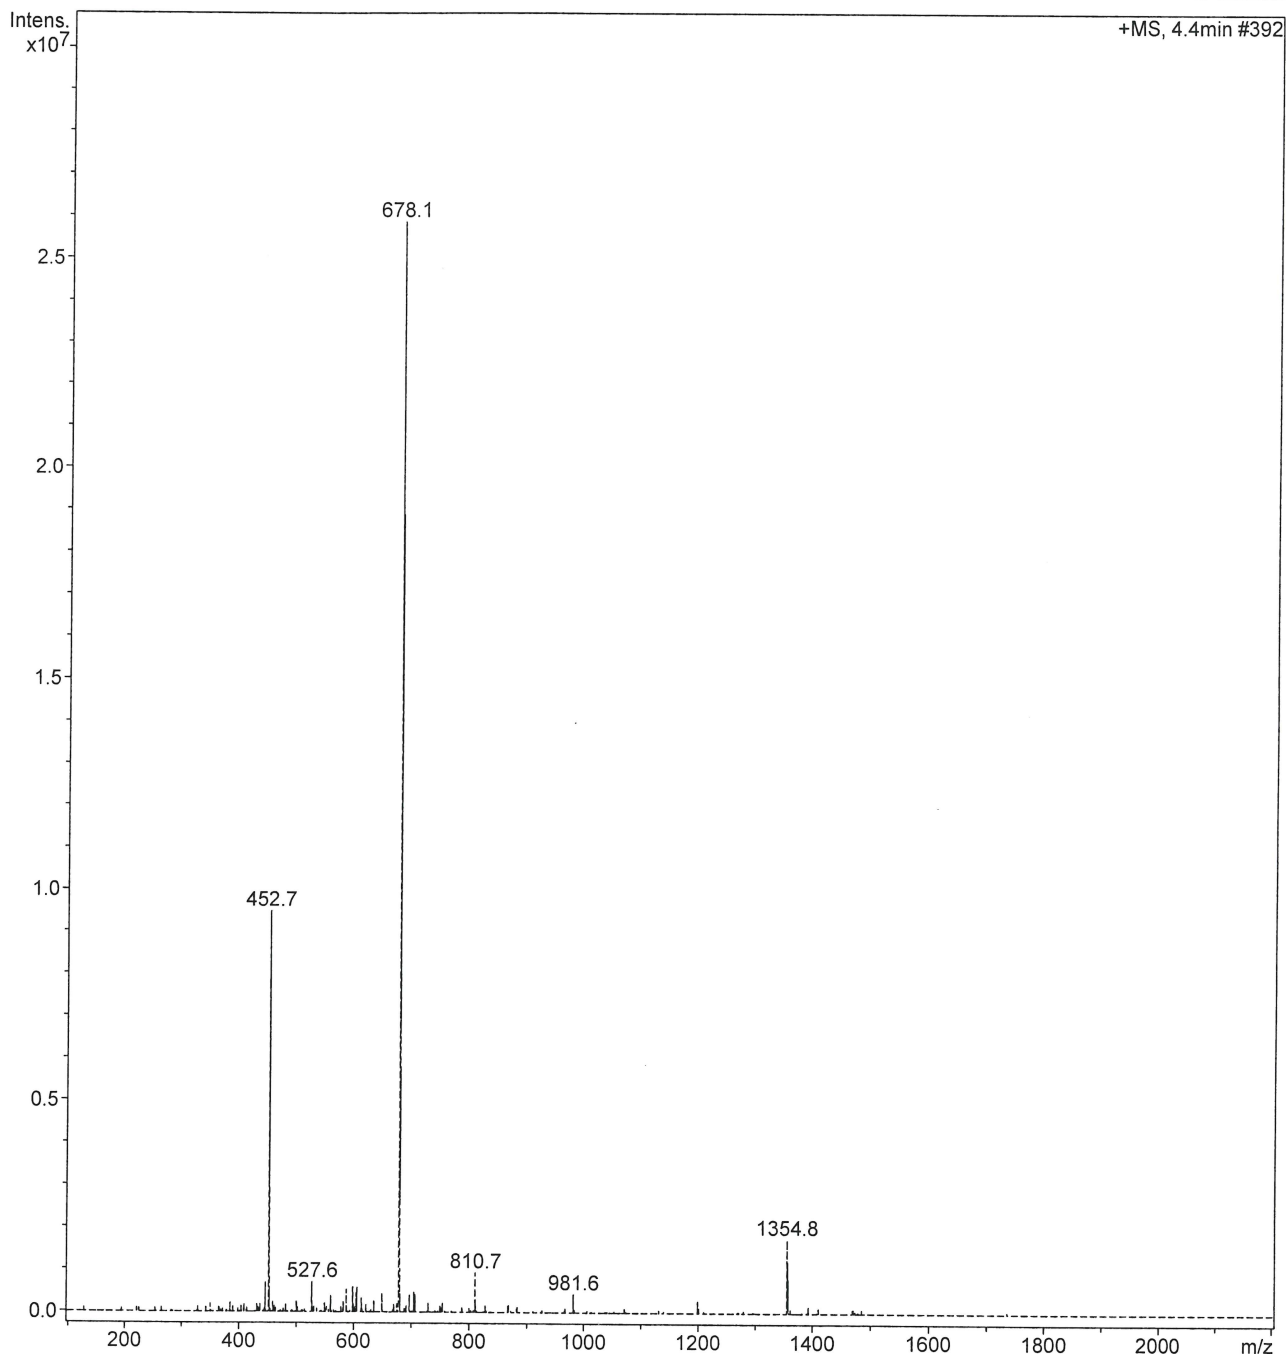

**$^1\text{H}$  NMR (500 MHz,  $\text{CD}_3\text{OD}$ )**

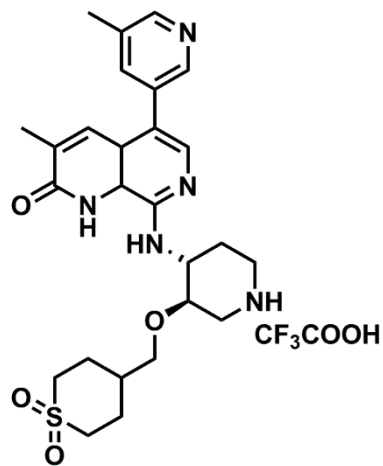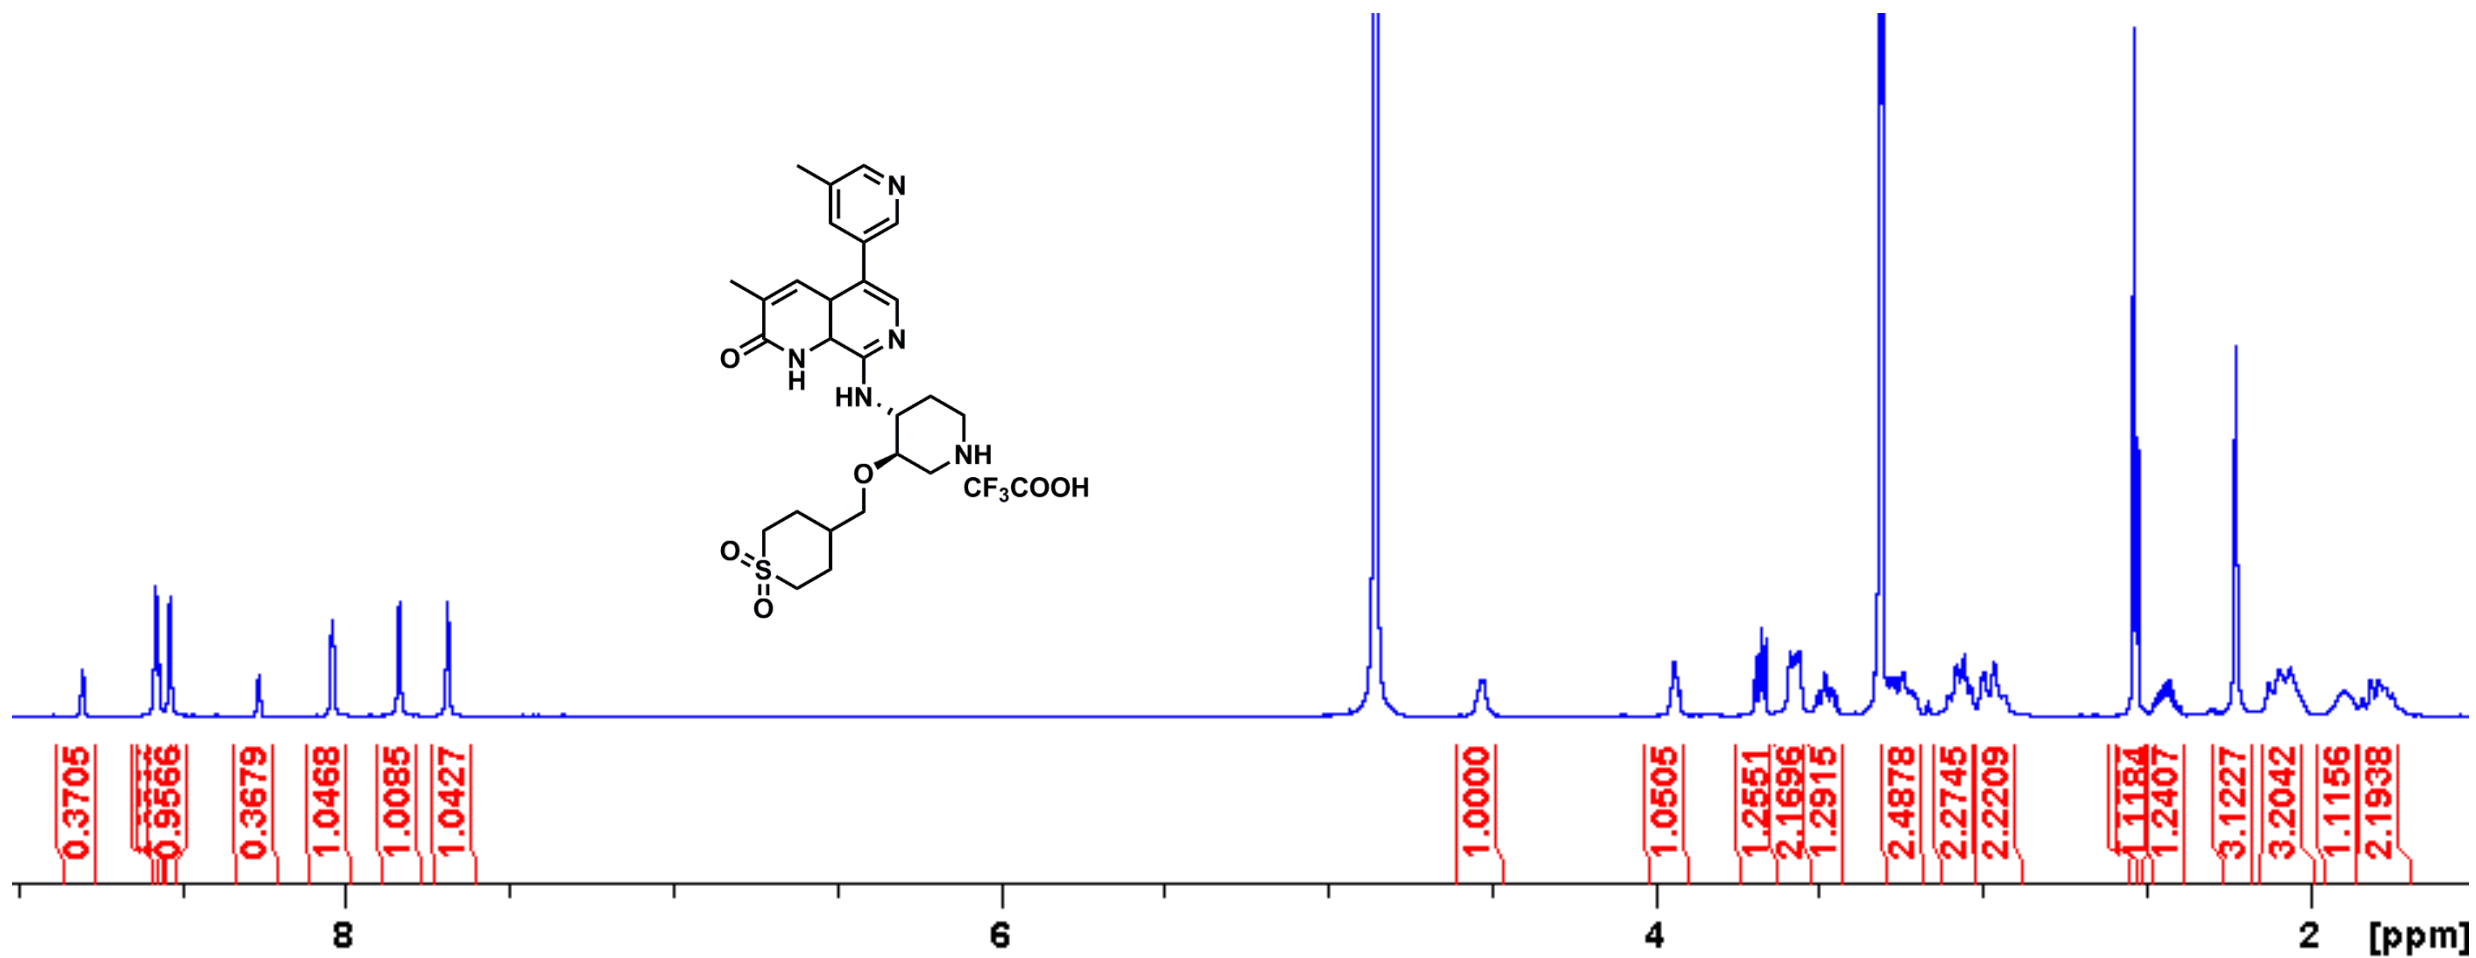

Supplement: NIHMS1669275-supplement-SHistone_peptide_and_compound_C-38_purity_identification_data.pdf [file NIHMS1669275-supplement-SHistone_peptide_and_compound_C-38_purity_identification_data.pdf]
